# Supplementary material for: Plasma and Serum Lipidomics of Healthy White Adults Shows Characteristic Profiles by Subjects’ Gender and Age
Source: PLoS One. 2014 Mar 14;9(3):e91806. doi: 10.1371/journal.pone.0091806 (PMC3954792; doi:10.1371/journal.pone.0091806)
Supplement: Table S1 — Dataset of internal standard (IS)-normalized peak hight of phosphoglycerolipids, sphingolipids and neutral lipids in human blood. (XLSX) [file pone.0091806.s001.xlsx]

## Sheet: suppl. Table 1
Table S1. Dataset of internal standard (IS)-normalized peak hight of phosphoglycerolipids, sphingolipids and neutral lipids in human blood.
					IS normalized peak height			IS normalized peak height			IS normalized peak height			IS normalized peak height
					Young Male			Young Female			Elderly Male			Elderly Female
		m/z	RT [min]		Plasma	Serum		Plasma	Serum		Plasma	Serum		Plasma	Serum
					Median (interquartile)	Median (interquartile)		Median (interquartile)	Median (interquartile)		Median (interquartile)	Median (interquartile)		Median (interquartile)	Median (interquartile)
Lysophosphatidylcholine (lysoPC)
lysoPC(16:1)+HCOO		538.314	2.63221		7.19E+01 (6.17E+01 - 8.85E+01)	9.83E+01 (7.94E+01 - 1.28E+02)		5.69E+01 (4.61E+01 - 8.50E+01)	9.89E+01 (9.09E+01 - 1.43E+02)		7.46E+01 (6.90E+01 - 9.00E+01)	1.13E+02 (9.56E+01 - 1.23E+02)		9.60E+01 (8.03E+01 - 1.10E+02)	1.20E+02 (1.07E+02 - 1.77E+02)
lysoPC(16:0)+HCOO		540.332	3.31838		3.33E+03 (2.46E+03 - 3.90E+03)	5.15E+03 (3.90E+03 - 5.66E+03)		2.63E+03 (2.20E+03 - 3.64E+03)	4.73E+03 (3.98E+03 - 6.54E+03)		3.50E+03 (3.12E+03 - 3.82E+03)	5.30E+03 (4.63E+03 - 6.07E+03)		3.58E+03 (3.23E+03 - 3.81E+03)	5.27E+03 (4.94E+03 - 6.19E+03)
lysoPC(17:0)+HCOO		554.345	3.79583		5.27E+01 (4.17E+01 - 6.83E+01)	8.01E+01 (6.72E+01 - 9.79E+01)		4.81E+01 (3.65E+01 - 6.24E+01)	8.63E+01 (6.81E+01 - 1.06E+02)		5.26E+01 (4.25E+01 - 6.80E+01)	8.70E+01 (7.28E+01 - 9.74E+01)		5.43E+01 (4.51E+01 - 7.69E+01)	9.64E+01 (7.31E+01 - 1.16E+02)
lysoPC(18:2)+HCOO		564.329	2.75409		1.49E+03 (1.05E+03 - 1.99E+03)	1.57E+03 (1.19E+03 - 1.86E+03)		9.28E+02 (7.66E+02 - 1.19E+03)	1.08E+03 (9.14E+02 - 1.41E+03)		1.20E+03 (1.07E+03 - 2.16E+03)	1.30E+03 (1.17E+03 - 2.41E+03)		1.20E+03 (9.55E+02 - 1.63E+03)	1.27E+03 (9.75E+02 - 1.65E+03)
lysoPC(18:1)+HCOO		566.345	3.43935		6.71E+02 (5.84E+02 - 9.08E+02)	8.90E+02 (7.94E+02 - 1.06E+03)		5.21E+02 (4.03E+02 - 6.62E+02)	7.55E+02 (6.97E+02 - 8.89E+02)		7.23E+02 (5.78E+02 - 9.38E+02)	8.85E+02 (7.83E+02 - 1.27E+03)		7.37E+02 (5.83E+02 - 8.51E+02)	9.75E+02 (7.89E+02 - 1.17E+03)
lysoPC(18:0)+HCOO		568.362	4.56834		1.38E+03 (1.19E+03 - 1.87E+03)	2.15E+03 (2.10E+03 - 2.47E+03)		1.22E+03 (1.00E+03 - 1.80E+03)	2.43E+03 (1.89E+03 - 3.06E+03)		1.54E+03 (1.46E+03 - 1.96E+03)	2.48E+03 (2.27E+03 - 3.16E+03)		1.76E+03 (1.57E+03 - 2.18E+03)	2.83E+03 (2.55E+03 - 3.48E+03)
lysoPC(20:4)+HCOO		588.33	2.64933		3.22E+02 (2.68E+02 - 4.39E+02)	4.42E+02 (3.71E+02 - 5.20E+02)		2.95E+02 (1.94E+02 - 3.81E+02)	4.38E+02 (3.58E+02 - 5.79E+02)		3.50E+02 (3.16E+02 - 4.36E+02)	4.73E+02 (4.16E+02 - 5.50E+02)		3.73E+02 (3.14E+02 - 5.15E+02)	5.50E+02 (3.95E+02 - 6.91E+02)
lysoPC(20:3)+HCOO		590.345	2.94955		8.27E+01 (7.04E+01 - 1.27E+02)	9.43E+01 (7.98E+01 - 1.14E+02)		7.77E+01 (5.67E+01 - 9.32E+01)	9.26E+01 (8.50E+01 - 1.31E+02)		1.01E+02 (7.67E+01 - 1.27E+02)	1.14E+02 (9.76E+01 - 1.37E+02)		9.86E+01 (8.61E+01 - 1.27E+02)	1.19E+02 (9.61E+01 - 1.32E+02)
lysoPC(22:6)+HCOO		612.33	2.45025		4.96E+01 (3.19E+01 - 6.04E+01)	6.05E+01 (4.74E+01 - 6.67E+01)		3.85E+01 (3.49E+01 - 5.79E+01)	6.49E+01 (5.08E+01 - 8.08E+01)		5.44E+01 (4.33E+01 - 6.91E+01)	6.97E+01 (5.94E+01 - 8.74E+01)		6.90E+01 (5.29E+01 - 8.24E+01)	8.88E+01 (7.05E+01 - 1.04E+02)
Phatidylcholine (PC)
PC(32:2)+HCOO	14:0-18:2 PC	774.527	12.4691		1.53E+02 (1.04E+02 - 2.25E+02)	1.27E+02 (9.74E+01 - 1.91E+02)		2.00E+02 (1.22E+02 - 2.37E+02)	1.64E+02 (1.17E+02 - 2.12E+02)		1.69E+02 (1.39E+02 - 2.31E+02)	1.52E+02 (1.31E+02 - 1.91E+02)		1.94E+02 (1.39E+02 - 2.81E+02)	1.61E+02 (1.32E+02 - 1.95E+02)
PC(32:1)+HCOO	16:0-16:1/14:0-18:1 PC	776.544	15.2408		4.52E+02 (2.89E+02 - 5.24E+02)	3.86E+02 (2.28E+02 - 4.24E+02)		4.77E+02 (3.17E+02 - 6.04E+02)	3.24E+02 (2.82E+02 - 4.87E+02)		3.86E+02 (2.59E+02 - 8.27E+02)	3.86E+02 (2.50E+02 - 6.72E+02)		6.50E+02 (2.84E+02 - 7.47E+02)	4.40E+02 (2.45E+02 - 5.52E+02)
PC(32:0)+HCOO	16:0-16:0 PC	778.558	18.9521		4.87E+02 (3.79E+02 - 5.75E+02)	4.30E+02 (3.65E+02 - 5.00E+02)		4.67E+02 (3.98E+02 - 5.74E+02)	4.79E+02 (3.93E+02 - 5.70E+02)		5.44E+02 (4.15E+02 - 5.85E+02)	5.26E+02 (4.70E+02 - 5.84E+02)		5.10E+02 (4.02E+02 - 5.57E+02)	4.35E+02 (4.30E+02 - 5.19E+02)
PC(33:2)+HCOO	15:0-18:2 PC	788.543	14.1024		1.48E+02 (1.12E+02 - 1.84E+02)	1.27E+02 (1.07E+02 - 1.61E+02)		1.35E+02 (1.22E+02 - 1.84E+02)	1.41E+02 (1.20E+02 - 1.62E+02)		1.39E+02 (1.27E+02 - 2.08E+02)	1.52E+02 (1.17E+02 - 1.97E+02)		1.47E+02 (1.14E+02 - 1.91E+02)	1.28E+02 (1.12E+02 - 1.37E+02)
PC(34:4)+HCOO	14:0-20:4 PC	798.527	11.7743		6.25E+01 (5.19E+01 - 8.12E+01)	5.65E+01 (4.01E+01 - 8.82E+01)		7.91E+01 (5.88E+01 - 1.18E+02)	7.28E+01 (5.88E+01 - 1.13E+02)		8.20E+01 (5.62E+01 - 1.01E+02)	9.82E+01 (6.75E+01 - 1.03E+02)		1.07E+02 (8.47E+01 - 1.53E+02)	1.02E+02 (8.18E+01 - 1.14E+02)
PC(34:2)+HCOO	16:0-18:2 PC	802.558	15.83		1.95E+04 (1.45E+04 - 2.22E+04)	1.79E+04 (1.58E+04 - 1.89E+04)		1.79E+04 (1.62E+04 - 2.08E+04)	1.67E+04 (1.57E+04 - 2.05E+04)		1.88E+04 (1.64E+04 - 2.18E+04)	1.80E+04 (1.67E+04 - 2.18E+04)		1.90E+04 (1.67E+04 - 2.25E+04)	1.64E+04 (1.52E+04 - 1.74E+04)
PC(34:1)+HCOO	16:0-18:1 PC	804.574	19.0574		9.30E+03 (7.01E+03 - 1.13E+04)	8.85E+03 (6.84E+03 - 1.00E+04)		9.08E+03 (7.34E+03 - 1.06E+04)	8.78E+03 (7.18E+03 - 1.01E+04)		9.22E+03 (7.90E+03 - 1.10E+04)	9.71E+03 (8.15E+03 - 1.09E+04)		1.01E+04 (7.70E+03 - 1.14E+04)	9.61E+03 (7.28E+03 - 9.90E+03)
PC(34:0)+HCOO	16:0-18:0 PC	806.589	23.3253		1.72E+02 (1.43E+02 - 2.53E+02)	2.06E+02 (1.49E+02 - 2.25E+02)		1.60E+02 (1.41E+02 - 2.17E+02)	1.90E+02 (1.56E+02 - 2.61E+02)		1.95E+02 (1.72E+02 - 2.42E+02)	2.31E+02 (2.03E+02 - 2.54E+02)		2.09E+02 (1.80E+02 - 2.36E+02)	2.01E+02 (1.87E+02 - 2.45E+02)
PC(35:4)+HCOO	15:0-20:4 PC	812.543	13.3107		6.09E+01 (4.37E+01 - 8.45E+01)	5.95E+01 (3.77E+01 - 7.42E+01)		6.81E+01 (5.30E+01 - 9.03E+01)	6.35E+01 (5.06E+01 - 9.67E+01)		6.55E+01 (5.22E+01 - 8.12E+01)	7.08E+01 (5.89E+01 - 8.69E+01)		8.22E+01 (7.07E+01 - 1.05E+02)	7.61E+01 (5.89E+01 - 8.83E+01)
PC(35:3)+HCOO	17:1-18:2 PC	814.558	14.2822		4.60E+01 (3.58E+01 - 6.10E+01)	4.37E+01 (3.69E+01 - 5.86E+01)		4.20E+01 (3.65E+01 - 5.03E+01)	3.98E+01 (3.66E+01 - 5.51E+01)		4.42E+01 (3.73E+01 - 5.89E+01)	4.11E+01 (3.48E+01 - 5.81E+01)		5.71E+01 (3.54E+01 - 6.57E+01)	4.13E+01 (3.42E+01 - 5.08E+01)
PC(36:5)+HCOO	18:2-18:3 PC	824.544	11.129		6.71E+01 (4.74E+01 - 7.26E+01)	5.36E+01 (4.71E+01 - 7.29E+01)		4.86E+01 (3.11E+01 - 6.42E+01)	3.92E+01 (3.30E+01 - 5.62E+01)		6.45E+01 (4.07E+01 - 1.19E+02)	7.07E+01 (4.06E+01 - 1.43E+02)		6.21E+01 (4.06E+01 - 9.59E+01)	5.85E+01 (4.07E+01 - 7.63E+01)
PC(36:5)+HCOO	16:1-20:4 PC	824.543	12.0059		1.04E+02 (7.04E+01 - 1.25E+02)	9.53E+01 (7.56E+01 - 1.09E+02)		9.84E+01 (8.62E+01 - 1.27E+02)	9.91E+01 (8.04E+01 - 1.23E+02)		1.01E+02 (8.17E+01 - 1.08E+02)	1.07E+02 (8.67E+01 - 1.25E+02)		1.52E+02 (1.21E+02 - 1.70E+02)	1.39E+02 (1.14E+02 - 1.71E+02)
PC(36:5)+HCOO	16:0-20:5 PC	824.542	12.7105		5.87E+02 (4.12E+02 - 7.75E+02)	4.90E+02 (4.29E+02 - 7.28E+02)		6.44E+02 (4.16E+02 - 8.78E+02)	6.56E+02 (3.87E+02 - 8.16E+02)		8.29E+02 (6.71E+02 - 1.08E+03)	8.88E+02 (7.71E+02 - 1.11E+03)		8.62E+02 (6.69E+02 - 1.17E+03)	6.99E+02 (6.30E+02 - 1.05E+03)
PC(36:4)+HCOO	18:2-18:2 PC	826.559	13.2125		1.50E+03 (1.07E+03 - 2.35E+03)	1.54E+03 (1.10E+03 - 1.95E+03)		1.15E+03 (8.89E+02 - 1.40E+03)	1.19E+03 (8.54E+02 - 1.40E+03)		1.36E+03 (1.11E+03 - 2.08E+03)	1.36E+03 (1.10E+03 - 2.07E+03)		1.49E+03 (9.44E+02 - 1.82E+03)	1.19E+03 (8.87E+02 - 1.46E+03)
PC(36:4)+HCOO	16:0-20:4 PC	826.558	14.9408		1.09E+04 (8.85E+03 - 1.35E+04)	1.03E+04 (8.74E+03 - 1.20E+04)		1.12E+04 (9.87E+03 - 1.38E+04)	1.14E+04 (1.06E+04 - 1.53E+04)		1.18E+04 (1.10E+04 - 1.33E+04)	1.12E+04 (9.72E+03 - 1.33E+04)		1.33E+04 (1.16E+04 - 1.79E+04)	1.20E+04 (1.04E+04 - 1.40E+04)
PC(36:3)+HCOO	16:0-20:3 PC	828.579	16.679		3.01E+03 (2.32E+03 - 3.98E+03)	2.99E+03 (2.49E+03 - 3.50E+03)		3.56E+03 (2.86E+03 - 4.96E+03)	3.90E+03 (3.02E+03 - 5.04E+03)		3.39E+03 (2.81E+03 - 4.07E+03)	3.83E+03 (3.18E+03 - 4.57E+03)		4.10E+03 (3.32E+03 - 5.23E+03)	4.34E+03 (3.13E+03 - 4.90E+03)
PC(36:2)+HCOO	18:0-18:2 PC	830.591	19.7319		1.36E+04 (1.12E+04 - 1.59E+04)	1.24E+04 (1.16E+04 - 1.42E+04)		1.28E+04 (1.18E+04 - 1.50E+04)	1.29E+04 (1.09E+04 - 1.48E+04)		1.36E+04 (1.19E+04 - 1.60E+04)	1.28E+04 (1.15E+04 - 1.55E+04)		1.37E+04 (1.28E+04 - 1.76E+04)	1.29E+04 (1.18E+04 - 1.56E+04)
PC(36:1)+HCOO	18:0-18:1 PC	832.607	23.3864		1.85E+03 (1.45E+03 - 2.46E+03)	1.91E+03 (1.51E+03 - 2.19E+03)		1.89E+03 (1.61E+03 - 2.27E+03)	1.97E+03 (1.48E+03 - 2.16E+03)		2.02E+03 (1.88E+03 - 2.39E+03)	2.38E+03 (1.98E+03 - 2.53E+03)		2.64E+03 (1.83E+03 - 2.99E+03)	2.28E+03 (1.82E+03 - 2.82E+03)
PC(37:2)+HCOO	19:0-18:2 PC	844.606	21.8726		5.72E+01 (4.70E+01 - 7.80E+01)	5.37E+01 (4.62E+01 - 6.76E+01)		5.49E+01 (4.73E+01 - 7.49E+01)	5.55E+01 (3.97E+01 - 6.52E+01)		6.00E+01 (5.06E+01 - 7.81E+01)	6.64E+01 (5.18E+01 - 7.85E+01)		5.74E+01 (4.83E+01 - 7.28E+01)	5.19E+01 (4.83E+01 - 6.07E+01)
PC(38:6)+HCOO	18:2-20:4 PC	850.558	12.433		5.42E+02 (4.80E+02 - 7.74E+02)	5.74E+02 (4.69E+02 - 6.69E+02)		4.66E+02 (4.30E+02 - 5.63E+02)	5.09E+02 (4.28E+02 - 6.62E+02)		5.53E+02 (4.80E+02 - 7.20E+02)	5.95E+02 (4.91E+02 - 7.98E+02)		7.30E+02 (5.43E+02 - 8.76E+02)	6.22E+02 (5.19E+02 - 7.96E+02)
PC(38:6)+HCOO	16:0-22:6 PC	850.561	13.865		2.50E+03 (1.74E+03 - 3.73E+03)	2.55E+03 (1.92E+03 - 3.22E+03)		2.91E+03 (2.42E+03 - 3.77E+03)	3.00E+03 (2.63E+03 - 4.01E+03)		3.23E+03 (2.43E+03 - 3.39E+03)	3.12E+03 (2.61E+03 - 3.54E+03)		3.86E+03 (3.41E+03 - 4.78E+03)	3.67E+03 (3.31E+03 - 4.32E+03)
PC(38:5)+HCOO	16:0-22:5/18:1-20:4 PC	852.576	15.068		1.45E+03 (1.09E+03 - 1.82E+03)	1.44E+03 (1.22E+03 - 1.58E+03)		1.43E+03 (1.13E+03 - 1.78E+03)	1.46E+03 (1.14E+03 - 1.86E+03)		1.41E+03 (1.36E+03 - 1.70E+03)	1.66E+03 (1.48E+03 - 1.82E+03)		1.83E+03 (1.60E+03 - 2.03E+03)	1.73E+03 (1.60E+03 - 1.95E+03)
PC(38:5)+HCOO	18:0-20:5	852.575	16.1977		4.70E+02 (4.09E+02 - 6.39E+02)	4.81E+02 (4.18E+02 - 6.46E+02)		5.21E+02 (4.22E+02 - 6.64E+02)	5.99E+02 (4.20E+02 - 7.13E+02)		5.74E+02 (5.00E+02 - 7.77E+02)	6.45E+02 (5.66E+02 - 7.87E+02)		7.53E+02 (6.56E+02 - 9.81E+02)	7.86E+02 (5.93E+02 - 9.06E+02)
PC(38:4)+HCOO	16:0-22:4 PC	854.589	17.669		6.05E+02 (4.89E+02 - 7.50E+02)	5.75E+02 (4.74E+02 - 7.19E+02)		6.14E+02 (5.68E+02 - 7.42E+02)	7.29E+02 (5.63E+02 - 7.90E+02)		7.09E+02 (4.28E+02 - 8.27E+02)	6.81E+02 (4.94E+02 - 8.77E+02)		7.45E+02 (5.88E+02 - 8.52E+02)	7.65E+02 (5.66E+02 - 8.17E+02)
PC(38:4)+HCOO	18:0-20:4 PC	854.592	18.7267		6.63E+03 (4.21E+03 - 8.88E+03)	6.98E+03 (4.25E+03 - 7.32E+03)		7.50E+03 (4.99E+03 - 9.58E+03)	8.13E+03 (5.85E+03 - 1.11E+04)		6.86E+03 (6.23E+03 - 9.06E+03)	7.42E+03 (6.21E+03 - 8.65E+03)		9.60E+03 (8.63E+03 - 1.29E+04)	9.19E+03 (8.21E+03 - 1.12E+04)
PC(38:3)+HCOO	18:1-20:2/18:2-20:1 PC	856.61	19.6103		9.88E+01 (8.41E+01 - 1.29E+02)	1.09E+02 (9.42E+01 - 1.19E+02)		1.06E+02 (9.94E+01 - 1.34E+02)	1.09E+02 (8.70E+01 - 1.45E+02)		1.03E+02 (9.10E+01 - 1.26E+02)	1.21E+02 (1.00E+02 - 1.61E+02)		1.44E+02 (9.23E+01 - 1.63E+02)	1.29E+02 (9.82E+01 - 1.57E+02)
PC(38:3)+HCOO	18:0-20:3 PC	856.606	20.662		1.79E+03 (1.40E+03 - 2.33E+03)	1.77E+03 (1.51E+03 - 2.00E+03)		2.30E+03 (1.86E+03 - 3.21E+03)	2.49E+03 (2.04E+03 - 3.30E+03)		1.87E+03 (1.71E+03 - 2.43E+03)	2.25E+03 (1.85E+03 - 2.58E+03)		3.01E+03 (2.06E+03 - 3.90E+03)	3.05E+03 (2.12E+03 - 4.02E+03)
PC(40:8)+HCOO	18:2-22:6/20:4-20:4 PC	874.56	11.562		7.42E+01 (5.42E+01 - 8.69E+01)	7.85E+01 (6.25E+01 - 8.73E+01)		5.91E+01 (5.03E+01 - 9.03E+01)	6.38E+01 (5.49E+01 - 8.27E+01)		8.96E+01 (6.49E+01 - 1.02E+02)	9.00E+01 (7.18E+01 - 1.07E+02)		1.10E+02 (6.62E+01 - 1.21E+02)	1.08E+02 (6.65E+01 - 1.18E+02)
PC(40:7)+HCOO	18:1-22:6 PC	876.575	14.0561		1.35E+02 (7.85E+01 - 1.59E+02)	1.36E+02 (8.13E+01 - 1.54E+02)		1.34E+02 (1.18E+02 - 1.65E+02)	1.57E+02 (1.16E+02 - 1.75E+02)		1.40E+02 (1.14E+02 - 1.79E+02)	1.46E+02 (1.18E+02 - 1.99E+02)		2.27E+02 (1.61E+02 - 2.66E+02)	1.92E+02 (1.51E+02 - 2.58E+02)
PC(40:6)+HCOO	18:1-22:5 PC	878.588	15.3727		5.77E+01 (5.36E+01 - 8.38E+01)	6.91E+01 (5.61E+01 - 8.08E+01)		6.34E+01 (5.31E+01 - 8.14E+01)	5.98E+01 (5.35E+01 - 7.13E+01)		7.18E+01 (5.56E+01 - 7.84E+01)	8.21E+01 (6.82E+01 - 9.20E+01)		9.68E+01 (5.57E+01 - 1.15E+02)	8.86E+01 (6.41E+01 - 1.23E+02)
PC(40:6)+HCOO	18:0-22:6 PC	878.591	17.4088		8.77E+02 (6.67E+02 - 1.54E+03)	1.06E+03 (6.67E+02 - 1.26E+03)		1.18E+03 (9.63E+02 - 1.79E+03)	1.29E+03 (1.16E+03 - 1.64E+03)		1.24E+03 (1.10E+03 - 1.37E+03)	1.25E+03 (1.14E+03 - 1.45E+03)		2.02E+03 (1.50E+03 - 2.48E+03)	2.11E+03 (1.46E+03 - 2.24E+03)
PC(40:5)+HCOO	20:1-20:4 PC	880.607	18.7607		2.99E+02 (2.34E+02 - 4.23E+02)	3.40E+02 (2.53E+02 - 3.83E+02)		3.42E+02 (2.84E+02 - 3.78E+02)	3.54E+02 (2.74E+02 - 4.07E+02)		3.28E+02 (2.96E+02 - 4.13E+02)	4.07E+02 (3.22E+02 - 4.48E+02)		4.58E+02 (3.50E+02 - 6.00E+02)	4.68E+02 (3.20E+02 - 5.99E+02)
PC(40:5)+HCOO	18:0-22:5 PC	880.607	20.2458		2.43E+02 (1.55E+02 - 3.02E+02)	2.20E+02 (1.55E+02 - 2.99E+02)		2.20E+02 (1.93E+02 - 2.91E+02)	2.69E+02 (2.17E+02 - 3.47E+02)		2.41E+02 (1.85E+02 - 3.01E+02)	2.41E+02 (2.07E+02 - 3.15E+02)		3.86E+02 (3.11E+02 - 4.95E+02)	3.68E+02 (2.93E+02 - 5.37E+02)
PC(40:4)+HCOO	18:0-22:4 PC	882.62	21.7792		3.25E+02 (2.49E+02 - 3.99E+02)	3.07E+02 (2.42E+02 - 4.21E+02)		3.86E+02 (2.83E+02 - 4.59E+02)	3.95E+02 (3.05E+02 - 4.51E+02)		2.91E+02 (2.53E+02 - 4.28E+02)	3.98E+02 (2.64E+02 - 4.56E+02)		4.40E+02 (3.80E+02 - 5.48E+02)	4.87E+02 (3.58E+02 - 5.44E+02)
ether PC
PC(32:0p)+HCOO	16:0p-16:0 PC	762.565	20.8213		1.09E+02 (8.54E+01 - 1.27E+02)	9.10E+01 (8.41E+01 - 1.26E+02)		1.05E+02 (8.34E+01 - 1.30E+02)	1.09E+02 (8.47E+01 - 1.31E+02)		9.09E+01 (8.01E+01 - 1.22E+02)	1.04E+02 (8.92E+01 - 1.31E+02)		9.89E+01 (8.93E+01 - 1.21E+02)	9.57E+01 (8.18E+01 - 1.23E+02)
PC(32:0e)+HCOO	16:0e-16:0 PC	764.58	21.6433		9.80E+01 (9.06E+01 - 1.24E+02)	9.52E+01 (7.73E+01 - 1.20E+02)		1.15E+02 (8.60E+01 - 1.39E+02)	1.22E+02 (8.74E+01 - 1.25E+02)		1.02E+02 (8.58E+01 - 1.12E+02)	1.05E+02 (9.66E+01 - 1.21E+02)		1.07E+02 (9.63E+01 - 1.40E+02)	1.01E+02 (8.86E+01 - 1.23E+02)
PC(34:2p)+HCOO	16:0p-18:2 PC	786.564	17.4137		5.53E+02 (4.56E+02 - 6.80E+02)	5.70E+02 (5.15E+02 - 6.17E+02)		4.60E+02 (3.60E+02 - 5.98E+02)	5.26E+02 (3.80E+02 - 5.95E+02)		4.07E+02 (3.16E+02 - 6.57E+02)	3.99E+02 (3.17E+02 - 6.39E+02)		4.21E+02 (3.55E+02 - 5.29E+02)	4.37E+02 (3.22E+02 - 5.27E+02)
PC(34:2e)+HCOO	16:0e-18:2 PC	788.578	18.2269		3.09E+02 (2.76E+02 - 3.51E+02)	3.03E+02 (2.61E+02 - 3.30E+02)		3.23E+02 (2.62E+02 - 4.44E+02)	3.02E+02 (2.61E+02 - 4.76E+02)		2.67E+02 (2.06E+02 - 3.58E+02)	3.17E+02 (1.99E+02 - 3.60E+02)		3.15E+02 (2.79E+02 - 3.86E+02)	3.02E+02 (2.53E+02 - 3.62E+02)
PC(34:1p)+HCOO	16:0p-18:1/18:1p-16:0 PC	788.578	20.875		1.35E+02 (1.07E+02 - 1.50E+02)	1.43E+02 (1.14E+02 - 1.52E+02)		1.31E+02 (9.46E+01 - 1.66E+02)	1.23E+02 (1.04E+02 - 1.83E+02)		1.42E+02 (9.98E+01 - 1.59E+02)	1.56E+02 (1.11E+02 - 1.79E+02)		1.43E+02 (1.02E+02 - 1.66E+02)	1.28E+02 (1.04E+02 - 1.68E+02)
PC(34:1e)+HCOO	16:0e-18:1/18:1e-16:0 PC	790.598	21.6463		1.94E+02 (1.61E+02 - 2.40E+02)	1.81E+02 (1.60E+02 - 2.09E+02)		1.84E+02 (1.64E+02 - 2.52E+02)	2.03E+02 (1.68E+02 - 2.33E+02)		1.85E+02 (1.58E+02 - 2.10E+02)	1.94E+02 (1.71E+02 - 2.28E+02)		2.30E+02 (1.83E+02 - 2.49E+02)	2.08E+02 (1.75E+02 - 2.52E+02)
PC(36:4p)+HCOO	16:0p-20:4 PC	810.565	16.4081		8.81E+02 (7.31E+02 - 9.92E+02)	8.11E+02 (7.27E+02 - 9.76E+02)		8.50E+02 (5.66E+02 - 9.09E+02)	8.60E+02 (6.59E+02 - 1.03E+03)		6.96E+02 (5.27E+02 - 8.40E+02)	7.32E+02 (5.78E+02 - 9.07E+02)		8.92E+02 (6.81E+02 - 1.13E+03)	8.31E+02 (6.94E+02 - 1.21E+03)
PC(36:4e)+HCOO	16:0e-20:4 PC	812.58	17.1842		8.68E+02 (7.16E+02 - 9.24E+02)	8.21E+02 (6.48E+02 - 9.91E+02)		9.44E+02 (6.36E+02 - 1.09E+03)	9.76E+02 (6.37E+02 - 1.08E+03)		6.40E+02 (5.42E+02 - 8.30E+02)	6.71E+02 (5.43E+02 - 8.72E+02)		9.43E+02 (7.57E+02 - 1.08E+03)	8.22E+02 (7.33E+02 - 1.01E+03)
PC(36:3p)+HCOO	18:1p-18:2 PC	812.579	18.2726		9.78E+01 (8.90E+01 - 1.18E+02)	1.00E+02 (8.78E+01 - 1.27E+02)		9.79E+01 (8.30E+01 - 1.18E+02)	1.17E+02 (8.65E+01 - 1.27E+02)		9.19E+01 (6.41E+01 - 1.06E+02)	8.38E+01 (6.59E+01 - 1.21E+02)		1.04E+02 (7.96E+01 - 1.18E+02)	9.97E+01 (8.49E+01 - 1.10E+02)
PC(36:3e)+HCOO	18:1e-18:2 PC	814.593	18.2808		1.34E+02 (1.20E+02 - 1.81E+02)	1.34E+02 (1.25E+02 - 1.50E+02)		1.46E+02 (1.18E+02 - 1.75E+02)	1.68E+02 (1.19E+02 - 2.14E+02)		1.29E+02 (1.03E+02 - 1.72E+02)	1.48E+02 (1.06E+02 - 1.76E+02)		1.40E+02 (1.26E+02 - 1.65E+02)	1.37E+02 (1.25E+02 - 1.55E+02)
PC(36:2p)+HCOO	18:0p-18:2 PC	814.595	21.5585		1.26E+02 (1.18E+02 - 1.37E+02)	1.22E+02 (1.15E+02 - 1.35E+02)		1.09E+02 (8.95E+01 - 1.17E+02)	1.13E+02 (9.83E+01 - 1.29E+02)		8.88E+01 (7.23E+01 - 1.43E+02)	9.69E+01 (7.71E+01 - 1.50E+02)		9.83E+01 (8.46E+01 - 1.44E+02)	1.04E+02 (7.88E+01 - 1.27E+02)
PC(36:2e)+HCOO	18:0e-18:2 PC	816.612	22.4503		1.07E+02 (9.22E+01 - 1.26E+02)	1.01E+02 (8.67E+01 - 1.16E+02)		1.02E+02 (9.26E+01 - 1.41E+02)	1.09E+02 (8.59E+01 - 1.46E+02)		1.11E+02 (8.17E+01 - 1.26E+02)	1.15E+02 (8.12E+01 - 1.43E+02)		1.03E+02 (7.82E+01 - 1.31E+02)	1.09E+02 (9.40E+01 - 1.39E+02)
PC(38:5p)+HCOO	18:1p-20:4 PC	836.579	16.4857		1.76E+02 (1.54E+02 - 2.19E+02)	1.99E+02 (1.76E+02 - 2.12E+02)		1.88E+02 (1.28E+02 - 2.11E+02)	1.86E+02 (1.52E+02 - 2.25E+02)		1.69E+02 (1.18E+02 - 2.07E+02)	1.50E+02 (1.34E+02 - 2.04E+02)		2.16E+02 (1.73E+02 - 2.65E+02)	2.05E+02 (1.72E+02 - 2.64E+02)
PC(38:5e)+HCOO	18:1e-20:4 PC	838.596	17.2417		6.39E+02 (5.44E+02 - 7.08E+02)	5.87E+02 (5.32E+02 - 7.29E+02)		6.02E+02 (4.81E+02 - 8.39E+02)	7.18E+02 (5.13E+02 - 7.94E+02)		5.01E+02 (4.64E+02 - 6.71E+02)	5.44E+02 (4.91E+02 - 7.07E+02)		7.51E+02 (5.85E+02 - 8.13E+02)	7.11E+02 (5.61E+02 - 8.18E+02)
PC(38:4p)+HCOO	18:0p-20:4 PC	838.596	20.39		2.40E+02 (2.10E+02 - 2.69E+02)	2.53E+02 (2.18E+02 - 2.77E+02)		2.39E+02 (1.62E+02 - 2.67E+02)	2.23E+02 (1.82E+02 - 2.69E+02)		1.78E+02 (1.48E+02 - 2.32E+02)	2.15E+02 (1.59E+02 - 2.59E+02)		2.66E+02 (1.82E+02 - 3.83E+02)	2.59E+02 (1.95E+02 - 3.58E+02)
PC(38:4e)+HCOO	16:0e-22:4 PC	840.609	20.1968		9.87E+01 (7.98E+01 - 1.14E+02)	9.44E+01 (8.46E+01 - 1.16E+02)		8.43E+01 (7.12E+01 - 1.17E+02)	1.02E+02 (8.20E+01 - 1.20E+02)		8.12E+01 (6.18E+01 - 1.09E+02)	9.14E+01 (8.12E+01 - 1.12E+02)		9.88E+01 (8.99E+01 - 1.25E+02)	1.02E+02 (8.97E+01 - 1.29E+02)
PC(38:4e)+HCOO	18:0e-20:4 PC	840.611	21.337		3.87E+02 (3.41E+02 - 4.14E+02)	3.69E+02 (2.83E+02 - 4.59E+02)		3.52E+02 (2.87E+02 - 4.58E+02)	4.14E+02 (2.93E+02 - 4.73E+02)		3.41E+02 (2.50E+02 - 3.92E+02)	3.80E+02 (3.02E+02 - 4.60E+02)		4.27E+02 (3.70E+02 - 4.92E+02)	4.12E+02 (3.39E+02 - 5.13E+02)
PC(40:5e)+HCOO	20:1e-20:4/18:0e-22:5 PC	866.626	21.1992		7.03E+01 (5.85E+01 - 8.04E+01)	7.25E+01 (6.28E+01 - 8.88E+01)		6.97E+01 (6.31E+01 - 1.01E+02)	6.83E+01 (6.52E+01 - 8.66E+01)		6.11E+01 (5.78E+01 - 7.30E+01)	7.06E+01 (6.03E+01 - 8.17E+01)		8.48E+01 (6.71E+01 - 9.03E+01)	8.70E+01 (7.35E+01 - 1.01E+02)
PC(40:4e)+HCOO	20:0e-20:4 PC	868.641	25.843		5.34E+01 (4.64E+01 - 7.17E+01)	5.80E+01 (4.46E+01 - 7.38E+01)		6.37E+01 (5.05E+01 - 7.88E+01)	6.28E+01 (4.86E+01 - 8.61E+01)		5.29E+01 (3.99E+01 - 6.41E+01)	5.34E+01 (4.44E+01 - 7.41E+01)		6.80E+01 (5.89E+01 - 8.01E+01)	6.55E+01 (5.46E+01 - 6.89E+01)
PC(42:5e)+HCOO	22:1e-20:4/20:0e-22:5 PC	894.657	25.5936		6.57E+01 (5.86E+01 - 8.17E+01)	7.13E+01 (5.53E+01 - 8.55E+01)		6.44E+01 (5.91E+01 - 9.76E+01)	7.49E+01 (6.42E+01 - 8.87E+01)		5.84E+01 (5.13E+01 - 7.86E+01)	6.81E+01 (5.17E+01 - 8.80E+01)		8.37E+01 (7.34E+01 - 9.70E+01)	7.91E+01 (6.34E+01 - 9.33E+01)
Lysophosphatidylethanolamine (lysoPE)
lysoPE(18:2)-H		476.278	2.79333		8.50E+01 (5.79E+01 - 1.09E+02)	8.15E+01 (5.34E+01 - 1.07E+02)		5.10E+01 (4.28E+01 - 7.21E+01)	5.12E+01 (4.47E+01 - 7.50E+01)		8.14E+01 (7.06E+01 - 1.21E+02)	8.77E+01 (5.99E+01 - 1.14E+02)		6.94E+01 (5.22E+01 - 1.09E+02)	7.20E+01 (5.34E+01 - 1.01E+02)
lysoPE(20:4)-H		500.278	2.69144		6.25E+01 (5.51E+01 - 7.83E+01)	6.13E+01 (5.74E+01 - 7.17E+01)		5.83E+01 (4.17E+01 - 6.94E+01)	5.50E+01 (4.42E+01 - 6.67E+01)		6.33E+01 (5.43E+01 - 7.10E+01)	6.53E+01 (5.85E+01 - 7.96E+01)		7.03E+01 (5.62E+01 - 9.48E+01)	6.14E+01 (5.60E+01 - 8.34E+01)
Phatidylethanolamine (PE)
PE(34:2)-H	16:0-18:2 PE	714.507	16.3888		1.24E+02 (8.88E+01 - 1.78E+02)	1.28E+02 (8.73E+01 - 1.73E+02)		1.19E+02 (9.95E+01 - 1.37E+02)	1.16E+02 (8.58E+01 - 1.38E+02)		1.30E+02 (1.07E+02 - 1.78E+02)	1.48E+02 (1.17E+02 - 1.71E+02)		1.55E+02 (1.30E+02 - 2.00E+02)	1.51E+02 (1.37E+02 - 1.83E+02)
PE(34:1)-H	16:0-18:1 PE	716.523	19.6917		6.33E+01 (4.37E+01 - 9.83E+01)	6.01E+01 (4.77E+01 - 9.02E+01)		6.18E+01 (5.25E+01 - 7.64E+01)	5.72E+01 (4.60E+01 - 7.84E+01)		6.35E+01 (5.30E+01 - 9.72E+01)	7.77E+01 (5.55E+01 - 9.61E+01)		9.58E+01 (7.27E+01 - 1.23E+02)	8.36E+01 (6.40E+01 - 1.08E+02)
PE(36:3)-H	18:1-18:2 PE	740.521	16.5268		8.99E+01 (4.88E+01 - 1.26E+02)	7.86E+01 (4.90E+01 - 1.17E+02)		5.30E+01 (4.12E+01 - 7.56E+01)	5.65E+01 (4.44E+01 - 7.55E+01)		6.96E+01 (5.66E+01 - 1.48E+02)	7.84E+01 (5.90E+01 - 1.44E+02)		1.08E+02 (5.38E+01 - 1.37E+02)	8.71E+01 (5.38E+01 - 1.36E+02)
PE(36:2)-H	18:0-18:2 PE	742.538	20.4012		3.20E+02 (1.97E+02 - 4.16E+02)	2.99E+02 (1.97E+02 - 3.64E+02)		2.71E+02 (1.96E+02 - 3.20E+02)	2.61E+02 (1.90E+02 - 3.37E+02)		2.86E+02 (2.53E+02 - 4.45E+02)	3.04E+02 (2.63E+02 - 4.42E+02)		4.03E+02 (2.95E+02 - 4.60E+02)	3.56E+02 (2.85E+02 - 4.15E+02)
PE(36:1)-H	18:0-18:1 PE	744.554	24.1506		5.89E+01 (4.66E+01 - 9.15E+01)	5.70E+01 (4.12E+01 - 8.04E+01)		4.88E+01 (4.22E+01 - 7.74E+01)	4.68E+01 (3.95E+01 - 7.24E+01)		7.06E+01 (5.26E+01 - 1.01E+02)	6.65E+01 (5.21E+01 - 1.06E+02)		9.73E+01 (6.17E+01 - 1.05E+02)	8.91E+01 (5.47E+01 - 1.01E+02)
PE(38:6)-H	16:0-22:6 PE	762.506	14.3114		1.68E+02 (9.63E+01 - 1.82E+02)	1.41E+02 (9.13E+01 - 1.80E+02)		1.69E+02 (1.38E+02 - 2.47E+02)	1.56E+02 (1.48E+02 - 2.54E+02)		1.71E+02 (1.36E+02 - 2.22E+02)	1.91E+02 (1.40E+02 - 2.26E+02)		2.52E+02 (2.29E+02 - 3.00E+02)	2.42E+02 (1.96E+02 - 2.97E+02)
PE(38:5)-H	18:1-20:4 PE	764.526	15.5786		1.33E+02 (8.18E+01 - 1.82E+02)	1.24E+02 (8.78E+01 - 1.79E+02)		1.20E+02 (1.08E+02 - 1.48E+02)	1.16E+02 (1.01E+02 - 1.39E+02)		1.42E+02 (1.29E+02 - 1.48E+02)	1.49E+02 (1.33E+02 - 1.98E+02)		1.61E+02 (1.24E+02 - 1.93E+02)	1.91E+02 (1.52E+02 - 2.08E+02)
PE(38:4)-H	18:0-20:4 PE	766.54	19.3308		5.22E+02 (3.31E+02 - 7.25E+02)	5.77E+02 (3.32E+02 - 6.30E+02)		5.45E+02 (4.28E+02 - 6.98E+02)	5.40E+02 (4.58E+02 - 7.56E+02)		5.39E+02 (4.75E+02 - 6.17E+02)	5.56E+02 (4.75E+02 - 7.99E+02)		7.86E+02 (5.99E+02 - 8.39E+02)	6.94E+02 (5.73E+02 - 8.97E+02)
PE(40:6)-H	18:0-22:6 PE	790.54	18.0089		1.13E+02 (7.31E+01 - 1.64E+02)	1.07E+02 (7.88E+01 - 1.27E+02)		1.42E+02 (1.08E+02 - 1.79E+02)	1.45E+02 (1.15E+02 - 1.93E+02)		1.32E+02 (1.13E+02 - 1.47E+02)	1.41E+02 (1.12E+02 - 1.60E+02)		2.11E+02 (1.73E+02 - 2.41E+02)	2.10E+02 (1.62E+02 - 2.33E+02)
ether PE
PE(34:2p)-H	16:0p-18:2 PE	698.511	18.1092		1.56E+02 (1.12E+02 - 1.80E+02)	1.48E+02 (1.06E+02 - 1.92E+02)		1.22E+02 (1.02E+02 - 1.58E+02)	1.24E+02 (1.13E+02 - 1.74E+02)		1.27E+02 (9.43E+01 - 1.53E+02)	1.28E+02 (9.69E+01 - 1.79E+02)		1.43E+02 (1.14E+02 - 1.97E+02)	1.60E+02 (9.47E+01 - 1.85E+02)
PE(36:4p)-H	16:0p-20:4 PE	722.512	17.0465		4.92E+02 (4.44E+02 - 6.15E+02)	5.09E+02 (4.20E+02 - 6.02E+02)		5.49E+02 (4.18E+02 - 6.71E+02)	5.83E+02 (4.54E+02 - 6.86E+02)		4.46E+02 (3.54E+02 - 5.54E+02)	4.89E+02 (3.31E+02 - 6.76E+02)		7.39E+02 (5.10E+02 - 1.28E+03)	7.04E+02 (5.17E+02 - 1.18E+03)
PE(36:2p)-H	18:0p-18:2 PE	726.543	22.3932		2.44E+02 (1.89E+02 - 3.36E+02)	2.40E+02 (1.92E+02 - 3.19E+02)		1.81E+02 (1.63E+02 - 2.30E+02)	1.98E+02 (1.75E+02 - 2.68E+02)		2.24E+02 (1.76E+02 - 2.73E+02)	2.44E+02 (2.10E+02 - 2.99E+02)		2.19E+02 (1.68E+02 - 3.06E+02)	2.09E+02 (1.60E+02 - 2.82E+02)
PE(38:6p)-H	18:2p-20:4 PE	746.512	15.7596		3.41E+02 (2.61E+02 - 4.27E+02)	3.49E+02 (2.45E+02 - 4.25E+02)		3.76E+02 (3.19E+02 - 4.60E+02)	3.79E+02 (3.26E+02 - 4.37E+02)		3.21E+02 (2.61E+02 - 4.38E+02)	4.20E+02 (2.98E+02 - 5.03E+02)		5.85E+02 (4.01E+02 - 6.59E+02)	5.56E+02 (3.87E+02 - 6.57E+02)
PE(38:5p)-H	16:0p-22:5/18:1p-20:4 PE	748.528	17.1536		4.25E+02 (3.52E+02 - 5.06E+02)	4.20E+02 (4.02E+02 - 5.28E+02)		4.68E+02 (3.70E+02 - 5.18E+02)	4.75E+02 (3.88E+02 - 5.63E+02)		3.80E+02 (2.92E+02 - 4.51E+02)	4.66E+02 (3.02E+02 - 5.06E+02)		5.02E+02 (4.08E+02 - 8.16E+02)	5.41E+02 (3.93E+02 - 7.91E+02)
PE(38:4p)-H	18:0p-20:4 PE	750.543	21.1602		8.99E+02 (7.90E+02 - 1.02E+03)	9.28E+02 (8.21E+02 - 1.04E+03)		8.74E+02 (7.21E+02 - 1.07E+03)	9.66E+02 (8.00E+02 - 1.09E+03)		7.37E+02 (6.78E+02 - 8.91E+02)	7.55E+02 (6.52E+02 - 1.16E+03)		1.03E+03 (7.69E+02 - 1.90E+03)	1.03E+03 (7.59E+02 - 1.80E+03)
PE(40:7p)-H	N.D.	772.528	15.895		1.24E+02 (1.10E+02 - 1.75E+02)	1.24E+02 (1.06E+02 - 1.60E+02)		1.45E+02 (1.25E+02 - 1.77E+02)	1.45E+02 (1.18E+02 - 1.88E+02)		1.49E+02 (1.07E+02 - 1.68E+02)	1.64E+02 (1.19E+02 - 2.14E+02)		1.94E+02 (1.65E+02 - 2.86E+02)	2.04E+02 (1.78E+02 - 2.86E+02)
PE(40:6p)-H	18:0p-22:6 PE	774.544	19.6691		1.89E+02 (1.48E+02 - 2.88E+02)	2.24E+02 (1.63E+02 - 2.42E+02)		2.18E+02 (1.99E+02 - 2.58E+02)	2.28E+02 (2.04E+02 - 2.85E+02)		2.09E+02 (1.80E+02 - 2.74E+02)	2.14E+02 (1.92E+02 - 3.34E+02)		3.70E+02 (2.77E+02 - 4.77E+02)	3.57E+02 (2.46E+02 - 5.03E+02)
PE(40:6e)-H	18:0e-22:6 PE	776.562	21.1586
Phosphatidylinositol (PI)					8.52E+01 (7.59E+01 - 9.71E+01)	9.30E+01 (7.52E+01 - 9.87E+01)		8.03E+01 (7.24E+01 - 8.31E+01)	8.61E+01 (7.28E+01 - 1.08E+02)		7.10E+01 (5.99E+01 - 9.18E+01)	7.93E+01 (6.72E+01 - 9.30E+01)		8.64E+01 (7.61E+01 - 1.36E+02)	1.01E+02 (7.66E+01 - 1.34E+02)
PI(34:2)-H	16:0-18:2 PI	833.517	13.292		5.63E+02 (3.26E+02 - 8.93E+02)	5.44E+02 (3.18E+02 - 7.88E+02)		5.50E+02 (3.35E+02 - 7.10E+02)	5.31E+02 (3.92E+02 - 6.48E+02)		6.21E+02 (3.95E+02 - 7.29E+02)	5.08E+02 (3.81E+02 - 6.21E+02)		6.23E+02 (4.92E+02 - 9.81E+02)	5.50E+02 (3.57E+02 - 6.92E+02)
PI(36:1)-H	18:0-18:1 PI	863.563	19.959		1.81E+02 (1.16E+02 - 2.06E+02)	1.82E+02 (1.26E+02 - 2.12E+02)		1.32E+02 (9.81E+01 - 1.63E+02)	1.34E+02 (1.06E+02 - 1.64E+02)		1.74E+02 (1.35E+02 - 2.12E+02)	1.90E+02 (1.44E+02 - 2.32E+02)		1.48E+02 (1.24E+02 - 2.25E+02)	1.52E+02 (1.07E+02 - 2.14E+02)
PI(36:4)-H	16:0-20:4 PI	857.517	12.5328		1.86E+02 (1.46E+02 - 3.27E+02)	2.08E+02 (1.68E+02 - 2.66E+02)		2.34E+02 (1.63E+02 - 2.74E+02)	2.21E+02 (1.70E+02 - 2.53E+02)		2.26E+02 (1.80E+02 - 2.68E+02)	2.43E+02 (2.06E+02 - 2.99E+02)		2.76E+02 (1.79E+02 - 3.58E+02)	2.62E+02 (1.66E+02 - 3.27E+02)
PI(36:3)-H	18:1-18:2 PI	859.532	13.3537		1.77E+02 (1.02E+02 - 2.90E+02)	1.73E+02 (1.04E+02 - 2.44E+02)		1.55E+02 (1.01E+02 - 1.92E+02)	1.54E+02 (1.13E+02 - 2.00E+02)		1.73E+02 (1.33E+02 - 3.18E+02)	1.75E+02 (1.29E+02 - 4.31E+02)		2.09E+02 (1.24E+02 - 2.70E+02)	1.78E+02 (1.31E+02 - 2.75E+02)
PI(36:2)-H	18:0-18:2 PI	861.549	16.7208		6.63E+02 (5.18E+02 - 8.02E+02)	7.52E+02 (5.01E+02 - 8.03E+02)		5.81E+02 (4.45E+02 - 8.14E+02)	6.42E+02 (5.19E+02 - 8.49E+02)		7.40E+02 (4.91E+02 - 9.02E+02)	8.11E+02 (5.22E+02 - 9.66E+02)		7.34E+02 (5.64E+02 - 9.21E+02)	6.65E+02 (5.44E+02 - 8.48E+02)
PI(38:5)-H	18:1-20:4 PI	883.529	12.8673		8.49E+01 (7.33E+01 - 1.87E+02)	9.66E+01 (7.64E+01 - 1.37E+02)		6.52E+01 (5.36E+01 - 1.09E+02)	8.56E+01 (5.68E+01 - 1.06E+02)		8.54E+01 (7.18E+01 - 1.09E+02)	8.90E+01 (5.77E+01 - 1.08E+02)		1.10E+02 (8.15E+01 - 1.81E+02)	9.40E+01 (7.89E+01 - 1.17E+02)
PI(38:4)-H	18:0-20:4 PI	885.552	15.8546		2.20E+03 (1.78E+03 - 3.10E+03)	2.32E+03 (2.06E+03 - 3.23E+03)		2.39E+03 (1.83E+03 - 3.04E+03)	2.51E+03 (2.10E+03 - 3.38E+03)		2.34E+03 (2.03E+03 - 2.92E+03)	2.60E+03 (2.27E+03 - 3.23E+03)		2.71E+03 (2.42E+03 - 3.61E+03)	2.80E+03 (2.38E+03 - 3.43E+03)
PI(38:3)-H	18:0-20:3 PI	887.563	17.5697		1.88E+02 (1.49E+02 - 2.91E+02)	1.90E+02 (1.57E+02 - 2.46E+02)		2.25E+02 (1.35E+02 - 2.77E+02)	2.09E+02 (1.58E+02 - 2.99E+02)		1.96E+02 (1.69E+02 - 2.47E+02)	2.19E+02 (1.69E+02 - 2.56E+02)		1.97E+02 (1.76E+02 - 2.65E+02)	1.81E+02 (1.68E+02 - 2.36E+02)
Sphingomyelin (SM)
SM(33:1)+HCOO	d17:1-16:0 SM	733.548	13.4553		2.33E+02 (2.10E+02 - 2.96E+02)	2.48E+02 (1.92E+02 - 2.96E+02)		3.00E+02 (2.24E+02 - 3.61E+02)	3.35E+02 (2.72E+02 - 3.79E+02)		2.49E+02 (2.15E+02 - 2.92E+02)	2.76E+02 (2.29E+02 - 3.43E+02)		3.09E+02 (2.66E+02 - 4.20E+02)	3.45E+02 (2.70E+02 - 4.01E+02)
SM(34:2)+HCOO	d18:2-16:0 SM	745.548	12.1258		9.84E+02 (6.90E+02 - 1.09E+03)	9.58E+02 (6.93E+02 - 1.07E+03)		1.24E+03 (1.04E+03 - 1.46E+03)	1.26E+03 (1.15E+03 - 1.52E+03)		9.13E+02 (7.95E+02 - 1.10E+03)	9.63E+02 (8.58E+02 - 1.25E+03)		1.36E+03 (1.19E+03 - 1.78E+03)	1.26E+03 (1.18E+03 - 1.71E+03)
SM(34:1)+HCOO	d18:1-16:0 SM	747.565	15.2916		6.97E+03 (4.88E+03 - 9.40E+03)	6.51E+03 (5.44E+03 - 8.18E+03)		7.11E+03 (6.39E+03 - 8.63E+03)	7.20E+03 (6.72E+03 - 8.22E+03)		7.03E+03 (5.70E+03 - 8.44E+03)	7.45E+03 (6.37E+03 - 8.29E+03)		7.85E+03 (7.03E+03 - 8.95E+03)	7.46E+03 (6.66E+03 - 8.15E+03)
SM(34:0)+HCOO	d18:0-16:0 SM	749.573	16.9329		3.44E+02 (3.15E+02 - 4.24E+02)	3.55E+02 (3.23E+02 - 4.36E+02)		3.94E+02 (3.31E+02 - 4.32E+02)	4.26E+02 (3.52E+02 - 4.66E+02)		3.61E+02 (3.24E+02 - 3.98E+02)	4.27E+02 (3.71E+02 - 4.81E+02)		4.95E+02 (3.58E+02 - 6.25E+02)	4.82E+02 (3.98E+02 - 6.88E+02)
SM(35:1)+HCOO	d17:1-18:0/d18:1-17:0 SM	761.58	17.2211		1.17E+02 (9.69E+01 - 1.74E+02)	1.28E+02 (1.10E+02 - 1.75E+02)		1.52E+02 (1.36E+02 - 2.01E+02)	1.68E+02 (1.56E+02 - 2.15E+02)		1.25E+02 (1.13E+02 - 1.79E+02)	1.32E+02 (1.10E+02 - 1.85E+02)		1.74E+02 (1.47E+02 - 2.01E+02)	1.84E+02 (1.61E+02 - 1.93E+02)
SM(36:2)+HCOO	d18:2-18:0 SM	773.58	15.5181		4.64E+02 (3.60E+02 - 6.01E+02)	4.48E+02 (3.58E+02 - 6.58E+02)		8.03E+02 (6.61E+02 - 9.24E+02)	8.15E+02 (7.45E+02 - 9.86E+02)		5.12E+02 (4.23E+02 - 5.93E+02)	5.43E+02 (4.29E+02 - 7.02E+02)		8.67E+02 (7.15E+02 - 1.08E+03)	8.09E+02 (6.73E+02 - 1.04E+03)
SM(36:1)+HCOO	d18:1-18:0 SM	775.596	19.348		9.42E+02 (8.18E+02 - 1.29E+03)	8.97E+02 (8.39E+02 - 1.47E+03)		1.47E+03 (1.24E+03 - 1.71E+03)	1.53E+03 (1.42E+03 - 1.80E+03)		1.11E+03 (8.72E+02 - 1.33E+03)	1.27E+03 (9.77E+02 - 1.39E+03)		1.72E+03 (1.45E+03 - 1.81E+03)	1.65E+03 (1.40E+03 - 1.78E+03)
SM(36:0)+HCOO	d18:0-18:0 SM	777.602	21.1694		1.04E+02 (8.43E+01 - 1.35E+02)	9.60E+01 (8.50E+01 - 1.55E+02)		1.48E+02 (1.10E+02 - 1.66E+02)	1.57E+02 (1.26E+02 - 1.93E+02)		1.08E+02 (7.67E+01 - 1.53E+02)	1.11E+02 (8.52E+01 - 1.56E+02)		2.01E+02 (1.52E+02 - 2.40E+02)	1.97E+02 (1.66E+02 - 2.22E+02)
SM(38:2)+HCOO	d18:1-20:1 SM	801.611	19.4967		2.61E+02 (2.05E+02 - 3.04E+02)	2.61E+02 (2.21E+02 - 3.33E+02)		3.79E+02 (3.32E+02 - 4.43E+02)	4.12E+02 (3.61E+02 - 4.66E+02)		2.73E+02 (2.53E+02 - 3.53E+02)	3.17E+02 (2.62E+02 - 4.01E+02)		4.97E+02 (3.74E+02 - 5.64E+02)	4.33E+02 (3.77E+02 - 5.54E+02)
SM(38:1)+HCOO	d18:1-20:0 SM	803.627	23.7624		6.92E+02 (5.66E+02 - 8.59E+02)	7.04E+02 (6.10E+02 - 8.16E+02)		8.80E+02 (7.50E+02 - 1.12E+03)	1.00E+03 (8.02E+02 - 1.12E+03)		7.87E+02 (7.00E+02 - 9.07E+02)	9.12E+02 (7.38E+02 - 1.12E+03)		1.01E+03 (8.99E+02 - 1.21E+03)	9.61E+02 (9.15E+02 - 1.14E+03)
SM(39:1)+HCOO	d16:1-23:0/d17:1-22:0 SM	817.642	26.1529		2.43E+02 (1.85E+02 - 3.37E+02)	2.67E+02 (2.09E+02 - 2.83E+02)		3.39E+02 (2.69E+02 - 4.13E+02)	3.77E+02 (2.83E+02 - 4.14E+02)		2.83E+02 (2.36E+02 - 3.42E+02)	3.18E+02 (2.54E+02 - 3.93E+02)		3.82E+02 (3.00E+02 - 4.79E+02)	3.73E+02 (3.09E+02 - 4.49E+02)
SM(40:3)+HCOO	d18:2-22:1 SM	827.629	19.3804		6.85E+01 (6.50E+01 - 7.95E+01)	7.63E+01 (5.82E+01 - 9.11E+01)		1.01E+02 (8.44E+01 - 1.44E+02)	1.22E+02 (1.02E+02 - 1.58E+02)		7.97E+01 (5.93E+01 - 8.93E+01)	7.75E+01 (6.31E+01 - 9.41E+01)		1.07E+02 (8.63E+01 - 1.42E+02)	1.12E+02 (8.86E+01 - 1.39E+02)
SM(40:2)+HCOO	d18:2-22:0 SM	829.642	23.9832		8.80E+02 (6.83E+02 - 1.28E+03)	9.26E+02 (7.41E+02 - 1.09E+03)		1.15E+03 (1.04E+03 - 1.32E+03)	1.29E+03 (1.07E+03 - 1.43E+03)		9.88E+02 (7.92E+02 - 1.28E+03)	1.16E+03 (9.44E+02 - 1.34E+03)		1.43E+03 (1.20E+03 - 1.70E+03)	1.40E+03 (1.18E+03 - 1.73E+03)
SM(40:1)+HCOO	d18:1-22:0 SM	831.66	28.5777		1.83E+03 (1.53E+03 - 2.70E+03)	1.95E+03 (1.61E+03 - 2.43E+03)		2.42E+03 (1.86E+03 - 2.60E+03)	2.37E+03 (1.94E+03 - 2.71E+03)		2.15E+03 (1.83E+03 - 2.74E+03)	2.47E+03 (2.20E+03 - 2.93E+03)		2.47E+03 (2.26E+03 - 3.09E+03)	2.66E+03 (2.23E+03 - 3.03E+03)
SM(40:0)+HCOO	d18:0-22:0 SM	833.673	30.6104		5.46E+01 (4.75E+01 - 7.90E+01)	6.57E+01 (4.21E+01 - 7.85E+01)		7.70E+01 (4.82E+01 - 1.02E+02)	8.06E+01 (5.07E+01 - 1.26E+02)		5.66E+01 (4.57E+01 - 9.36E+01)	7.17E+01 (5.60E+01 - 1.09E+02)		1.07E+02 (7.80E+01 - 1.29E+02)	9.88E+01 (8.79E+01 - 1.37E+02)
SM(41:2)+HCOO	d18:2-23:0 SM	843.658	26.3748		3.86E+02 (2.80E+02 - 5.27E+02)	4.04E+02 (3.30E+02 - 4.76E+02)		5.01E+02 (4.32E+02 - 5.91E+02)	5.70E+02 (4.91E+02 - 6.20E+02)		3.81E+02 (3.55E+02 - 4.76E+02)	4.62E+02 (3.84E+02 - 4.99E+02)		6.37E+02 (5.19E+02 - 7.56E+02)	6.31E+02 (5.03E+02 - 7.59E+02)
SM(41:1)+HCOO	d18:1-23:0 SM	845.673	30.9486		9.37E+02 (7.18E+02 - 1.18E+03)	9.10E+02 (7.65E+02 - 1.08E+03)		1.08E+03 (8.91E+02 - 1.22E+03)	1.06E+03 (9.46E+02 - 1.20E+03)		9.57E+02 (7.53E+02 - 1.21E+03)	1.07E+03 (8.93E+02 - 1.30E+03)		1.21E+03 (1.04E+03 - 1.38E+03)	1.24E+03 (1.10E+03 - 1.40E+03)
SM(42:4)+HCOO	d18:2-24:2 SM	853.645	19.6574		1.22E+02 (1.11E+02 - 1.37E+02)	1.29E+02 (1.18E+02 - 1.50E+02)		2.07E+02 (1.61E+02 - 2.25E+02)	2.33E+02 (1.68E+02 - 2.49E+02)		1.17E+02 (8.79E+01 - 1.32E+02)	1.35E+02 (1.13E+02 - 1.56E+02)		2.06E+02 (1.68E+02 - 2.79E+02)	2.08E+02 (1.58E+02 - 2.47E+02)
SM(42:3)+HCOO	d18:2-24:1 SM	855.659	23.7276		1.39E+03 (1.12E+03 - 1.62E+03)	1.36E+03 (1.19E+03 - 1.55E+03)		1.95E+03 (1.54E+03 - 2.08E+03)	1.94E+03 (1.63E+03 - 2.37E+03)		1.31E+03 (1.12E+03 - 1.59E+03)	1.48E+03 (1.36E+03 - 1.80E+03)		1.76E+03 (1.65E+03 - 2.66E+03)	2.00E+03 (1.67E+03 - 2.55E+03)
SM(42:2)+HCOO	d18:1-24:1 SM	857.677	28.2082		2.74E+03 (2.53E+03 - 3.58E+03)	2.81E+03 (2.50E+03 - 3.65E+03)		3.36E+03 (3.07E+03 - 3.90E+03)	3.78E+03 (3.19E+03 - 4.54E+03)		2.84E+03 (2.44E+03 - 3.42E+03)	3.38E+03 (3.04E+03 - 3.91E+03)		3.88E+03 (3.39E+03 - 4.82E+03)	4.00E+03 (3.53E+03 - 4.41E+03)
SM(42:1)+HCOO	d18:0-24:1 SM	859.688	30.2673		9.34E+01 (5.74E+01 - 1.14E+02)	9.44E+01 (5.51E+01 - 1.36E+02)		1.08E+02 (8.07E+01 - 1.43E+02)	1.26E+02 (8.24E+01 - 1.65E+02)		8.40E+01 (6.92E+01 - 1.44E+02)	1.01E+02 (7.65E+01 - 1.44E+02)		1.47E+02 (1.41E+02 - 2.11E+02)	1.61E+02 (1.37E+02 - 1.88E+02)
SM(42:1)+HCOO	d18:1-24:0 SM	859.69	33.2123		1.62E+03 (1.42E+03 - 2.26E+03)	1.67E+03 (1.43E+03 - 2.24E+03)		1.70E+03 (1.34E+03 - 2.08E+03)	1.88E+03 (1.57E+03 - 2.05E+03)		1.68E+03 (1.47E+03 - 2.38E+03)	1.96E+03 (1.79E+03 - 2.56E+03)		1.78E+03 (1.74E+03 - 2.28E+03)	2.01E+03 (1.77E+03 - 2.24E+03)
Ceramide (Cer)
Cer(34:1)+HCOO	N.D.	582.51	17.2713		8.17E+01 (5.40E+01 - 8.71E+01)	8.22E+01 (7.20E+01 - 8.99E+01)		8.30E+01 (7.06E+01 - 1.06E+02)	8.16E+01 (6.85E+01 - 1.02E+02)		9.10E+01 (7.26E+01 - 1.16E+02)	9.61E+01 (8.05E+01 - 1.15E+02)		1.05E+02 (9.40E+01 - 1.15E+02)	1.01E+02 (8.69E+01 - 1.21E+02)
Cer(40:1)+HCOO	d18:1-22:0 Cer	666.602	31.2694		1.76E+02 (1.20E+02 - 2.45E+02)	1.66E+02 (1.49E+02 - 2.23E+02)		2.05E+02 (1.59E+02 - 2.64E+02)	1.93E+02 (1.61E+02 - 2.70E+02)		2.15E+02 (1.99E+02 - 2.52E+02)	2.52E+02 (1.97E+02 - 3.11E+02)		2.61E+02 (1.98E+02 - 3.10E+02)	2.63E+02 (1.90E+02 - 3.12E+02)
Cer(41:1)+HCOO	d18:1-23:0 Cer	680.618	33.5633		2.01E+02 (1.20E+02 - 2.67E+02)	1.94E+02 (1.32E+02 - 2.22E+02)		1.99E+02 (1.60E+02 - 2.45E+02)	2.01E+02 (1.69E+02 - 2.47E+02)		2.15E+02 (1.89E+02 - 2.63E+02)	2.14E+02 (1.92E+02 - 2.97E+02)		2.59E+02 (2.12E+02 - 2.99E+02)	2.45E+02 (2.02E+02 - 2.90E+02)
Cer(42:3)+HCOO	N.D.	690.603	26.4395		3.74E+01 (3.20E+01 - 4.88E+01)	4.06E+01 (2.68E+01 - 5.25E+01)		5.04E+01 (4.57E+01 - 5.80E+01)	4.94E+01 (4.59E+01 - 5.76E+01)		4.04E+01 (3.56E+01 - 4.67E+01)	5.03E+01 (4.11E+01 - 5.66E+01)		6.66E+01 (4.92E+01 - 7.61E+01)	6.99E+01 (5.56E+01 - 7.25E+01)
Cer(42:2)+HCOO	d18:1-24:1 Cer	692.617	30.9276		2.28E+02 (1.72E+02 - 2.69E+02)	2.17E+02 (1.70E+02 - 2.57E+02)		2.39E+02 (2.25E+02 - 2.91E+02)	2.86E+02 (2.37E+02 - 3.11E+02)		2.44E+02 (2.14E+02 - 2.69E+02)	2.95E+02 (2.39E+02 - 3.45E+02)		3.12E+02 (2.93E+02 - 3.74E+02)	3.28E+02 (3.17E+02 - 3.88E+02)
Cer(42:2)+HCOO	N.D.	692.618	31.5127		7.33E+01 (6.23E+01 - 1.46E+02)	7.78E+01 (6.99E+01 - 1.26E+02)		9.84E+01 (9.10E+01 - 1.26E+02)	1.06E+02 (8.87E+01 - 1.35E+02)		1.11E+02 (9.21E+01 - 1.29E+02)	1.29E+02 (1.15E+02 - 1.66E+02)		1.31E+02 (1.03E+02 - 1.59E+02)	1.49E+02 (1.14E+02 - 1.65E+02)
Cer(42:1)+HCOO	d18:1-24:0 Cer	694.634	35.8128		5.61E+02 (3.66E+02 - 8.50E+02)	5.32E+02 (4.18E+02 - 8.00E+02)		6.00E+02 (4.22E+02 - 7.21E+02)	6.17E+02 (4.37E+02 - 7.45E+02)		6.85E+02 (5.84E+02 - 8.99E+02)	9.76E+02 (6.91E+02 - 1.00E+03)		6.96E+02 (5.09E+02 - 8.16E+02)	7.53E+02 (6.05E+02 - 8.82E+02)
Cerebroside (CB)
mono-hex CB(34:1)+HCOO	N.D.	744.563	15.0025		1.03E+02 (8.27E+01 - 1.12E+02)	1.01E+02 (8.15E+01 - 1.21E+02)		1.03E+02 (8.73E+01 - 1.31E+02)	1.17E+02 (1.05E+02 - 1.36E+02)		1.11E+02 (9.14E+01 - 1.24E+02)	1.33E+02 (1.13E+02 - 1.40E+02)		1.03E+02 (8.97E+01 - 1.34E+02)	1.17E+02 (1.03E+02 - 1.33E+02)
mono-hex CB(40:1)+HCOO	d18:1-22:0 mono-hex CB	828.655	28.2156		1.72E+02 (1.30E+02 - 1.90E+02)	1.50E+02 (1.14E+02 - 2.11E+02)		1.53E+02 (1.33E+02 - 1.92E+02)	1.76E+02 (1.45E+02 - 2.07E+02)		1.61E+02 (1.48E+02 - 2.12E+02)	1.90E+02 (1.69E+02 - 2.56E+02)		1.70E+02 (1.35E+02 - 1.97E+02)	1.84E+02 (1.37E+02 - 2.06E+02)
mono-hex CB(41:1)+HCOO	d18:1-23:0 mono-hex CB	842.671	30.5429		7.26E+01 (5.63E+01 - 7.95E+01)	6.04E+01 (5.50E+01 - 7.88E+01)		6.47E+01 (5.36E+01 - 7.45E+01)	7.67E+01 (6.36E+01 - 8.08E+01)		7.10E+01 (5.90E+01 - 8.80E+01)	8.15E+01 (6.42E+01 - 1.06E+02)		6.59E+01 (5.81E+01 - 8.11E+01)	6.80E+01 (5.58E+01 - 7.35E+01)
mono-hex CB(42:2)+HCOO	d18:1-24:1 mono-hex CB	854.672	27.8583		1.12E+02 (9.19E+01 - 1.27E+02)	1.06E+02 (8.95E+01 - 1.17E+02)		1.07E+02 (9.92E+01 - 1.51E+02)	1.09E+02 (9.51E+01 - 1.48E+02)		1.15E+02 (8.98E+01 - 1.27E+02)	1.19E+02 (1.00E+02 - 1.54E+02)		1.10E+02 (9.27E+01 - 1.52E+02)	1.21E+02 (9.78E+01 - 1.33E+02)
mono-hex CB(42:1)+HCOO	d18:1-24:0 mono-hex CB	856.688	32.8242		2.28E+02 (1.71E+02 - 2.68E+02)	1.88E+02 (1.65E+02 - 2.82E+02)		1.93E+02 (1.63E+02 - 2.47E+02)	2.05E+02 (1.73E+02 - 2.45E+02)		2.21E+02 (1.71E+02 - 2.59E+02)	2.44E+02 (2.28E+02 - 3.02E+02)		1.89E+02 (1.50E+02 - 2.14E+02)	1.93E+02 (1.64E+02 - 2.29E+02)
di-hex CB(34:1)+HCOO	d18:1-16:0 di-hex CB	906.615	14.1825		2.04E+02 (1.82E+02 - 3.00E+02)	2.42E+02 (2.00E+02 - 2.86E+02)		2.48E+02 (2.30E+02 - 3.29E+02)	2.68E+02 (2.29E+02 - 3.44E+02)		1.96E+02 (1.79E+02 - 2.75E+02)	2.24E+02 (1.98E+02 - 2.81E+02)		2.52E+02 (2.09E+02 - 2.97E+02)	2.67E+02 (2.05E+02 - 2.96E+02)
di-hex CB(42:2)+HCOO	N.D.	1016.73	26.5989		6.80E+01 (4.94E+01 - 7.45E+01)	5.60E+01 (5.30E+01 - 7.60E+01)		5.88E+01 (4.45E+01 - 8.03E+01)	7.19E+01 (5.60E+01 - 8.35E+01)		5.65E+01 (4.42E+01 - 6.77E+01)	5.75E+01 (4.72E+01 - 7.10E+01)		6.39E+01 (4.40E+01 - 7.17E+01)	6.02E+01 (4.62E+01 - 7.42E+01)
tri-hex CB(34:1)+HCOO	N.D.	1068.67	13.4515		5.67E+01 (4.63E+01 - 7.88E+01)	5.77E+01 (5.25E+01 - 6.87E+01)		8.17E+01 (6.10E+01 - 9.40E+01)	7.91E+01 (6.19E+01 - 1.01E+02)		6.26E+01 (5.53E+01 - 7.70E+01)	6.07E+01 (5.57E+01 - 8.15E+01)		7.48E+01 (6.90E+01 - 9.66E+01)	6.89E+01 (6.60E+01 - 8.42E+01)
Cholesterol (Ch)
Ch-OH		369.352	13.3671		2.58E+03 (2.17E+03 - 2.79E+03)	2.43E+03 (2.10E+03 - 2.63E+03)		2.42E+03 (2.31E+03 - 2.74E+03)	2.42E+03 (2.31E+03 - 2.74E+03)		2.42E+03 (2.29E+03 - 2.62E+03)	2.46E+03 (2.25E+03 - 2.88E+03)		2.59E+03 (2.35E+03 - 2.86E+03)	2.61E+03 (2.46E+03 - 2.70E+03)
Cholesteryl Ester (ChE)
ChE(16:0)+NH4		642.619	50.353		2.80E+02 (2.40E+02 - 2.90E+02)	2.71E+02 (2.44E+02 - 3.12E+02)		2.78E+02 (2.57E+02 - 2.86E+02)	3.05E+02 (2.70E+02 - 3.57E+02)		2.81E+02 (2.60E+02 - 3.11E+02)	3.04E+02 (2.76E+02 - 3.25E+02)		3.09E+02 (2.84E+02 - 3.21E+02)	3.16E+02 (2.86E+02 - 3.46E+02)
ChE(16:1)+NH4		640.604	46.9882		2.76E+02 (2.18E+02 - 3.23E+02)	2.82E+02 (2.30E+02 - 3.23E+02)		3.14E+02 (2.34E+02 - 3.61E+02)	3.40E+02 (2.82E+02 - 4.06E+02)		2.60E+02 (2.34E+02 - 3.56E+02)	3.04E+02 (2.29E+02 - 4.21E+02)		3.16E+02 (2.46E+02 - 4.00E+02)	3.55E+02 (2.73E+02 - 3.69E+02)
ChE(18:1)+NH4		668.635	50.2243		1.62E+03 (1.33E+03 - 2.00E+03)	1.68E+03 (1.42E+03 - 1.91E+03)		1.63E+03 (1.51E+03 - 1.76E+03)	1.78E+03 (1.58E+03 - 1.90E+03)		1.68E+03 (1.55E+03 - 1.85E+03)	1.78E+03 (1.59E+03 - 1.98E+03)		1.76E+03 (1.66E+03 - 1.86E+03)	1.92E+03 (1.62E+03 - 2.01E+03)
ChE(18:2)+NH4		666.62	47.3643		2.13E+04 (2.02E+04 - 2.44E+04)	2.22E+04 (2.00E+04 - 2.34E+04)		2.11E+04 (1.99E+04 - 2.31E+04)	2.42E+04 (2.12E+04 - 2.58E+04)		2.30E+04 (1.93E+04 - 2.39E+04)	2.34E+04 (2.25E+04 - 2.38E+04)		2.19E+04 (2.08E+04 - 2.50E+04)	2.55E+04 (2.15E+04 - 2.80E+04)
ChE(18:3)+NH4		664.604	44.5331		1.82E+03 (1.55E+03 - 2.13E+03)	1.86E+03 (1.46E+03 - 2.30E+03)		1.98E+03 (1.57E+03 - 2.18E+03)	2.03E+03 (1.68E+03 - 2.52E+03)		2.36E+03 (1.89E+03 - 3.01E+03)	2.40E+03 (2.16E+03 - 2.99E+03)		2.52E+03 (1.69E+03 - 2.92E+03)	2.48E+03 (1.93E+03 - 3.05E+03)
ChE(20:2)+NH4		694.652	49.6107		1.05E+02 (6.90E+01 - 1.40E+02)	1.01E+02 (7.54E+01 - 1.50E+02)		8.60E+01 (6.83E+01 - 1.19E+02)	1.02E+02 (7.49E+01 - 1.24E+02)		7.84E+01 (6.94E+01 - 1.08E+02)	1.04E+02 (6.66E+01 - 1.27E+02)		7.18E+01 (5.74E+01 - 1.03E+02)	7.61E+01 (5.55E+01 - 1.17E+02)
ChE(20:3)+NH4		692.635	47.7827		1.51E+03 (1.39E+03 - 1.84E+03)	1.53E+03 (1.42E+03 - 1.90E+03)		1.88E+03 (1.29E+03 - 2.55E+03)	2.19E+03 (1.40E+03 - 2.63E+03)		1.58E+03 (1.47E+03 - 1.79E+03)	1.73E+03 (1.58E+03 - 1.95E+03)		2.01E+03 (1.64E+03 - 2.52E+03)	2.20E+03 (1.80E+03 - 2.77E+03)
ChE(20:4)+NH4		690.619	45.5717		1.60E+04 (1.51E+04 - 2.17E+04)	1.85E+04 (1.57E+04 - 2.07E+04)		1.93E+04 (1.64E+04 - 2.25E+04)	1.99E+04 (1.84E+04 - 2.52E+04)		1.90E+04 (1.56E+04 - 2.13E+04)	1.98E+04 (1.69E+04 - 2.38E+04)		2.19E+04 (1.96E+04 - 2.42E+04)	2.45E+04 (1.85E+04 - 2.89E+04)
ChE(20:5)+NH4		688.603	42.5529		9.81E+02 (6.63E+02 - 1.25E+03)	1.09E+03 (6.83E+02 - 1.33E+03)		1.17E+03 (8.84E+02 - 1.47E+03)	1.37E+03 (8.66E+02 - 1.74E+03)		1.44E+03 (1.20E+03 - 2.02E+03)	1.82E+03 (1.45E+03 - 2.41E+03)		1.80E+03 (1.39E+03 - 2.39E+03)	1.96E+03 (1.40E+03 - 2.49E+03)
ChE(22:4)+NH4		718.651	48.1618		9.48E+01 (7.93E+01 - 1.14E+02)	9.85E+01 (8.37E+01 - 1.27E+02)		1.02E+02 (7.76E+01 - 1.13E+02)	1.10E+02 (9.54E+01 - 1.28E+02)		8.79E+01 (8.33E+01 - 1.09E+02)	9.40E+01 (8.40E+01 - 1.20E+02)		1.10E+02 (9.92E+01 - 1.40E+02)	1.13E+02 (9.75E+01 - 1.38E+02)
ChE(22:5)+NH4		716.635	46.5896		1.54E+02 (1.25E+02 - 1.92E+02)	1.51E+02 (1.23E+02 - 1.81E+02)		1.55E+02 (1.33E+02 - 1.70E+02)	1.71E+02 (1.32E+02 - 2.02E+02)		1.54E+02 (1.15E+02 - 1.97E+02)	1.76E+02 (1.27E+02 - 2.04E+02)		2.41E+02 (2.06E+02 - 2.99E+02)	2.45E+02 (2.15E+02 - 3.48E+02)
ChE(22:6)+NH4		714.619	43.7325		1.37E+03 (9.90E+02 - 2.10E+03)	1.56E+03 (1.03E+03 - 2.00E+03)		1.75E+03 (1.36E+03 - 2.17E+03)	2.02E+03 (1.56E+03 - 2.81E+03)		1.59E+03 (1.41E+03 - 2.25E+03)	1.86E+03 (1.58E+03 - 2.44E+03)		2.76E+03 (2.46E+03 - 3.57E+03)	2.96E+03 (2.73E+03 - 3.83E+03)
Coenzyme Q10 (CoQ10)
CoQ10+NH4		880.719	41.5501		2.79E+02 (2.34E+02 - 3.42E+02)	2.71E+02 (2.46E+02 - 3.52E+02)		2.21E+02 (2.00E+02 - 3.09E+02)	2.42E+02 (2.21E+02 - 3.57E+02)		2.44E+02 (1.97E+02 - 2.90E+02)	2.61E+02 (2.19E+02 - 3.75E+02)		3.09E+02 (2.52E+02 - 4.01E+02)	3.15E+02 (2.76E+02 - 3.95E+02)
Diacylglycerol (DG)
34:2 DG+NH4		610.541	20.6382		1.40E+02 (6.40E+01 - 2.10E+02)	2.41E+02 (1.48E+02 - 4.23E+02)		1.10E+02 (9.77E+01 - 1.79E+02)	2.60E+02 (1.83E+02 - 4.01E+02)		1.23E+02 (1.01E+02 - 1.85E+02)	2.57E+02 (1.96E+02 - 2.85E+02)		1.58E+02 (1.08E+02 - 2.43E+02)	3.69E+02 (2.85E+02 - 4.24E+02)
34:2 DG+NH4		610.541	21.2591		1.46E+02 (1.07E+02 - 3.32E+02)	2.14E+02 (1.79E+02 - 4.80E+02)		1.63E+02 (1.38E+02 - 2.22E+02)	3.21E+02 (2.08E+02 - 4.10E+02)		1.92E+02 (1.44E+02 - 2.75E+02)	3.14E+02 (2.16E+02 - 4.61E+02)		2.81E+02 (1.86E+02 - 3.29E+02)	4.10E+02 (3.05E+02 - 5.49E+02)
34:1 DG+NH4		612.556	24.4092		9.89E+01 (4.52E+01 - 1.46E+02)	1.85E+02 (9.85E+01 - 3.43E+02)		7.64E+01 (6.31E+01 - 1.09E+02)	2.28E+02 (1.41E+02 - 3.12E+02)		8.70E+01 (7.13E+01 - 1.28E+02)	1.75E+02 (1.35E+02 - 2.99E+02)		1.05E+02 (6.15E+01 - 1.74E+02)	2.94E+02 (2.40E+02 - 3.17E+02)
34:1 DG+NH4		612.557	25.1617		1.77E+02 (7.78E+01 - 3.31E+02)	2.40E+02 (1.23E+02 - 5.31E+02)		1.76E+02 (1.12E+02 - 2.31E+02)	2.80E+02 (1.74E+02 - 3.97E+02)		1.77E+02 (1.59E+02 - 3.25E+02)	2.72E+02 (2.05E+02 - 5.26E+02)		2.46E+02 (1.90E+02 - 3.50E+02)	4.73E+02 (3.09E+02 - 5.13E+02)
36:4 DG+NH4		634.542	17.883		2.51E+02 (1.15E+02 - 4.77E+02)	3.04E+02 (1.21E+02 - 4.43E+02)		2.02E+02 (1.73E+02 - 2.53E+02)	2.13E+02 (1.60E+02 - 3.12E+02)		2.30E+02 (1.28E+02 - 2.94E+02)	2.58E+02 (1.28E+02 - 3.82E+02)		2.89E+02 (2.00E+02 - 3.62E+02)	3.38E+02 (2.45E+02 - 3.99E+02)
36:3 DG+NH4		636.557	20.8384		1.50E+02 (7.57E+01 - 2.20E+02)	2.64E+02 (1.62E+02 - 4.72E+02)		1.07E+02 (7.55E+01 - 1.68E+02)	2.98E+02 (1.92E+02 - 3.76E+02)		1.37E+02 (1.10E+02 - 1.75E+02)	2.71E+02 (2.23E+02 - 3.22E+02)		1.46E+02 (9.11E+01 - 1.83E+02)	3.21E+02 (2.65E+02 - 4.43E+02)
36:2 DG+NH4		638.572	25.2728		4.10E+02 (1.19E+02 - 5.90E+02)	3.59E+02 (1.49E+02 - 5.87E+02)		2.84E+02 (2.35E+02 - 3.41E+02)	3.37E+02 (2.12E+02 - 4.03E+02)		2.53E+02 (1.98E+02 - 3.83E+02)	2.62E+02 (2.14E+02 - 4.72E+02)		3.60E+02 (3.03E+02 - 4.72E+02)	4.71E+02 (3.48E+02 - 5.67E+02)
Triacylglycerol (TG)
TG(40:0)+NH4		712.646	38.945		4.66E+01 (1.41E+01 - 5.84E+01)	4.72E+01 (3.87E+01 - 5.55E+01)		3.80E+01 (2.32E+01 - 4.41E+01)	2.29E+01 (1.54E+01 - 4.22E+01)		5.02E+01 (4.19E+01 - 6.09E+01)	4.71E+01 (1.64E+01 - 7.02E+01)		5.60E+01 (5.06E+01 - 6.44E+01)	3.28E+01 (1.33E+01 - 5.76E+01)
TG(44:1)+NH4		766.693	42.3761		9.09E+01 (2.48E+01 - 1.45E+02)	9.57E+01 (3.82E+01 - 1.31E+02)		5.86E+01 (1.98E+01 - 1.83E+02)	5.73E+01 (1.96E+01 - 1.95E+02)		1.62E+02 (7.55E+01 - 8.79E+02)	1.29E+02 (7.59E+01 - 8.98E+02)		2.11E+02 (9.22E+01 - 5.51E+02)	1.73E+02 (9.00E+01 - 4.89E+02)
TG(44:0)+NH4		768.709	45.7371		2.12E+02 (6.06E+01 - 3.70E+02)	1.94E+02 (7.93E+01 - 3.41E+02)		1.47E+02 (6.21E+01 - 4.88E+02)	1.62E+02 (5.42E+01 - 5.30E+02)		2.22E+02 (1.51E+02 - 2.06E+03)	2.18E+02 (1.30E+02 - 2.06E+03)		3.54E+02 (1.99E+02 - 1.30E+03)	3.02E+02 (1.75E+02 - 1.43E+03)
TG(46:3)+NH4		790.694	38.9825		3.93E+01 (1.87E+01 - 6.43E+01)	3.63E+01 (1.88E+01 - 5.93E+01)		2.75E+01 (1.35E+01 - 4.94E+01)	2.17E+01 (7.36E+00 - 5.51E+01)		6.17E+01 (4.24E+01 - 1.85E+02)	6.36E+01 (3.99E+01 - 1.99E+02)		9.26E+01 (3.72E+01 - 1.36E+02)	8.91E+01 (4.00E+01 - 1.12E+02)
TG(46:2)+NH4		792.708	42.6558		1.98E+02 (1.34E+02 - 4.87E+02)	1.96E+02 (1.23E+02 - 4.84E+02)		2.74E+02 (9.18E+01 - 4.76E+02)	2.62E+02 (1.10E+02 - 4.89E+02)		4.47E+02 (1.88E+02 - 1.54E+03)	4.47E+02 (2.07E+02 - 1.68E+03)		4.01E+02 (2.60E+02 - 1.53E+03)	3.73E+02 (2.65E+02 - 1.55E+03)
TG(46:1)+NH4		794.725	45.6625		9.81E+02 (4.22E+02 - 1.84E+03)	1.05E+03 (5.20E+02 - 1.81E+03)		1.05E+03 (3.56E+02 - 2.54E+03)	1.03E+03 (3.35E+02 - 2.87E+03)		1.65E+03 (7.44E+02 - 1.03E+04)	1.70E+03 (6.22E+02 - 9.89E+03)		1.93E+03 (1.16E+03 - 9.91E+03)	1.64E+03 (1.10E+03 - 8.73E+03)
TG(46:0)+NH4		796.741	48.6449		4.20E+02 (1.98E+02 - 8.01E+02)	3.74E+02 (2.05E+02 - 7.91E+02)		5.21E+02 (1.62E+02 - 1.12E+03)	6.21E+02 (1.45E+02 - 1.32E+03)		5.33E+02 (3.71E+02 - 3.70E+03)	5.48E+02 (4.08E+02 - 3.68E+03)		9.77E+02 (3.73E+02 - 1.93E+03)	9.56E+02 (3.29E+02 - 1.69E+03)
TG(47:1)+NH4		808.741	47.1503		1.39E+02 (8.80E+01 - 2.39E+02)	1.90E+02 (6.70E+01 - 2.34E+02)		2.16E+02 (8.87E+01 - 2.50E+02)	2.01E+02 (6.13E+01 - 2.81E+02)		2.26E+02 (1.08E+02 - 9.26E+02)	1.76E+02 (1.03E+02 - 9.42E+02)		2.46E+02 (1.06E+02 - 3.52E+02)	1.97E+02 (1.33E+02 - 3.64E+02)
TG(47:0)+NH4		810.758	49.9472		1.11E+02 (4.49E+01 - 1.30E+02)	6.99E+01 (4.80E+01 - 1.45E+02)		9.12E+01 (4.43E+01 - 1.57E+02)	1.18E+02 (5.41E+01 - 2.35E+02)		1.46E+02 (7.69E+01 - 6.48E+02)	9.92E+01 (7.08E+01 - 6.76E+02)		1.34E+02 (6.57E+01 - 2.43E+02)	1.68E+02 (7.85E+01 - 2.35E+02)
TG(48:4)+NH4		816.709	39.3167		1.05E+02 (6.68E+01 - 1.38E+02)	9.45E+01 (6.12E+01 - 1.22E+02)		8.06E+01 (3.95E+01 - 1.23E+02)	8.03E+01 (3.86E+01 - 1.25E+02)		1.24E+02 (7.13E+01 - 2.53E+02)	1.16E+02 (8.06E+01 - 2.49E+02)		1.15E+02 (7.91E+01 - 1.89E+02)	1.10E+02 (7.22E+01 - 1.74E+02)
TG(48:3)+NH4		818.723	42.6401		7.38E+02 (4.76E+02 - 9.77E+02)	6.77E+02 (4.58E+02 - 9.96E+02)		8.63E+02 (3.04E+02 - 1.17E+03)	8.25E+02 (2.88E+02 - 1.19E+03)		1.07E+03 (6.85E+02 - 2.06E+03)	1.05E+03 (6.68E+02 - 2.21E+03)		1.18E+03 (7.63E+02 - 2.77E+03)	9.73E+02 (6.96E+02 - 2.69E+03)
TG(48:1)+NH4		822.756	48.5098		4.87E+03 (2.41E+03 - 1.07E+04)	4.74E+03 (2.37E+03 - 1.09E+04)		8.50E+03 (2.34E+03 - 1.41E+04)	7.93E+03 (2.48E+03 - 1.73E+04)		9.09E+03 (3.69E+03 - 3.21E+04)	5.53E+03 (3.72E+03 - 3.29E+04)		1.09E+04 (4.42E+03 - 1.57E+04)	1.07E+04 (6.41E+03 - 1.51E+04)
TG(48:0)+NH4		824.773	51.122		2.30E+03 (1.26E+03 - 4.19E+03)	2.05E+03 (1.24E+03 - 3.94E+03)		2.62E+03 (1.14E+03 - 6.05E+03)	3.05E+03 (1.09E+03 - 6.80E+03)		3.38E+03 (2.42E+03 - 2.09E+04)	4.23E+03 (2.32E+03 - 2.09E+04)		5.37E+03 (2.60E+03 - 1.28E+04)	4.90E+03 (2.94E+03 - 1.20E+04)
TG(49:3)+NH4		832.741	44.405		1.38E+02 (8.84E+01 - 2.17E+02)	1.43E+02 (9.27E+01 - 1.96E+02)		1.32E+02 (8.94E+01 - 1.85E+02)	1.32E+02 (7.88E+01 - 2.31E+02)		1.79E+02 (1.06E+02 - 3.38E+02)	1.60E+02 (1.11E+02 - 2.97E+02)		1.68E+02 (1.15E+02 - 2.75E+02)	1.76E+02 (1.05E+02 - 2.73E+02)
TG(49:2)+NH4		834.757	47.4642		4.00E+02 (1.96E+02 - 5.95E+02)	3.55E+02 (2.36E+02 - 5.80E+02)		4.27E+02 (2.92E+02 - 5.39E+02)	4.85E+02 (2.90E+02 - 5.65E+02)		5.25E+02 (3.27E+02 - 9.67E+02)	4.57E+02 (3.11E+02 - 1.08E+03)		4.32E+02 (3.28E+02 - 6.59E+02)	4.14E+02 (2.81E+02 - 6.70E+02)
TG(49:1)+NH4		836.77	49.2646		2.03E+02 (1.13E+02 - 5.71E+02)	2.10E+02 (1.08E+02 - 5.24E+02)		2.24E+02 (9.08E+01 - 3.28E+02)	1.95E+02 (9.77E+01 - 4.07E+02)		2.61E+02 (1.27E+02 - 9.91E+02)	2.60E+02 (1.60E+02 - 1.07E+03)		1.83E+02 (9.90E+01 - 3.52E+02)	2.11E+02 (1.07E+02 - 3.88E+02)
TG(49:1)+NH4		836.772	49.8253		5.54E+02 (3.05E+02 - 1.09E+03)	6.22E+02 (3.51E+02 - 1.10E+03)		8.19E+02 (4.41E+02 - 1.17E+03)	8.50E+02 (4.33E+02 - 1.19E+03)		9.49E+02 (5.20E+02 - 2.49E+03)	7.41E+02 (4.97E+02 - 2.73E+03)		9.14E+02 (6.28E+02 - 1.49E+03)	6.55E+02 (6.14E+02 - 1.32E+03)
TG(49:0)+NH4		838.791	51.6667		8.38E+01 (6.19E+01 - 1.63E+02)	9.23E+01 (6.76E+01 - 2.03E+02)		7.52E+01 (6.14E+01 - 1.48E+02)	1.07E+02 (5.76E+01 - 1.30E+02)		1.25E+02 (9.00E+01 - 4.68E+02)	1.65E+02 (7.60E+01 - 4.50E+02)		1.38E+02 (5.42E+01 - 1.99E+02)	1.12E+02 (7.68E+01 - 1.89E+02)
TG(49:0)+NH4		838.791	52.201		1.43E+02 (5.95E+01 - 2.22E+02)	1.18E+02 (6.77E+01 - 1.66E+02)		1.52E+02 (8.56E+01 - 2.16E+02)	1.71E+02 (8.36E+01 - 2.41E+02)		1.85E+02 (1.30E+02 - 6.34E+02)	1.87E+02 (1.37E+02 - 6.27E+02)		2.50E+02 (1.34E+02 - 2.91E+02)	2.31E+02 (1.37E+02 - 3.06E+02)
TG(50:4)+NH4		844.741	43.0247		1.74E+03 (9.89E+02 - 2.53E+03)	1.63E+03 (1.01E+03 - 2.42E+03)		1.48E+03 (9.54E+02 - 1.89E+03)	1.58E+03 (9.65E+02 - 2.09E+03)		2.00E+03 (1.06E+03 - 2.61E+03)	2.03E+03 (9.32E+02 - 2.82E+03)		2.21E+03 (1.45E+03 - 2.75E+03)	2.27E+03 (1.40E+03 - 2.74E+03)
TG(50:4)+NH4		844.742	44.8955		2.00E+02 (1.51E+02 - 3.68E+02)	2.00E+02 (1.41E+02 - 3.62E+02)		2.49E+02 (1.70E+02 - 3.96E+02)	2.71E+02 (1.95E+02 - 4.35E+02)		4.10E+02 (2.62E+02 - 7.33E+02)	4.14E+02 (2.55E+02 - 7.12E+02)		5.71E+02 (2.84E+02 - 7.94E+02)	4.34E+02 (3.13E+02 - 8.00E+02)
TG(50:3)+NH4		846.756	45.9071		2.15E+04 (1.16E+04 - 2.82E+04)	2.07E+04 (1.18E+04 - 2.74E+04)		2.32E+04 (1.58E+04 - 2.73E+04)	2.10E+04 (1.55E+04 - 3.12E+04)		2.25E+04 (1.50E+04 - 3.16E+04)	2.10E+04 (1.54E+04 - 3.35E+04)		2.50E+04 (2.03E+04 - 3.24E+04)	2.69E+04 (1.94E+04 - 3.92E+04)
TG(50:1)+NH4		850.79	50.9954		3.68E+04 (1.98E+04 - 5.48E+04)	3.94E+04 (1.80E+04 - 5.27E+04)		4.65E+04 (2.50E+04 - 5.39E+04)	4.90E+04 (2.59E+04 - 5.66E+04)		4.68E+04 (3.35E+04 - 8.66E+04)	5.90E+04 (3.20E+04 - 8.61E+04)		5.25E+04 (3.48E+04 - 7.61E+04)	5.48E+04 (3.67E+04 - 7.05E+04)
TG(50:0)+NH4		852.804	53.2026		2.89E+03 (1.36E+03 - 6.06E+03)	3.16E+03 (1.44E+03 - 6.16E+03)		2.84E+03 (1.30E+03 - 8.95E+03)	3.29E+03 (1.35E+03 - 7.87E+03)		3.80E+03 (3.18E+03 - 1.95E+04)	4.49E+03 (3.35E+03 - 1.75E+04)		8.37E+03 (3.21E+03 - 1.18E+04)	8.46E+03 (3.32E+03 - 1.43E+04)
TG(51:1)+NH4		864.803	52.0626		7.89E+02 (3.59E+02 - 1.43E+03)	9.11E+02 (3.43E+02 - 1.35E+03)		8.48E+02 (4.87E+02 - 1.07E+03)	9.83E+02 (5.00E+02 - 1.21E+03)		9.68E+02 (5.82E+02 - 2.41E+03)	8.69E+02 (6.25E+02 - 2.60E+03)		1.11E+03 (8.30E+02 - 1.53E+03)	1.15E+03 (7.82E+02 - 1.66E+03)
TG(51:2)+NH4		862.788	49.6662		2.22E+03 (1.10E+03 - 4.53E+03)	2.33E+03 (1.13E+03 - 3.84E+03)		1.94E+03 (1.59E+03 - 2.75E+03)	2.38E+03 (1.64E+03 - 3.00E+03)		2.18E+03 (1.38E+03 - 4.21E+03)	2.12E+03 (1.42E+03 - 4.23E+03)		2.64E+03 (1.75E+03 - 3.12E+03)	2.39E+03 (1.64E+03 - 3.18E+03)
TG(51:3)+NH4		860.773	47.3575		2.05E+03 (1.10E+03 - 3.18E+03)	1.88E+03 (1.07E+03 - 2.88E+03)		1.87E+03 (1.67E+03 - 2.25E+03)	2.19E+03 (1.72E+03 - 2.43E+03)		1.83E+03 (1.27E+03 - 3.21E+03)	1.95E+03 (1.39E+03 - 3.29E+03)		1.78E+03 (1.62E+03 - 2.68E+03)	2.02E+03 (1.44E+03 - 2.54E+03)
TG(51:4)+NH4		858.757	44.6735		5.80E+02 (2.80E+02 - 6.70E+02)	5.28E+02 (2.52E+02 - 6.12E+02)		3.89E+02 (3.31E+02 - 4.87E+02)	4.31E+02 (2.98E+02 - 5.70E+02)		4.93E+02 (2.66E+02 - 6.98E+02)	5.31E+02 (2.88E+02 - 7.65E+02)		4.43E+02 (3.33E+02 - 6.73E+02)	4.54E+02 (3.56E+02 - 6.23E+02)
TG(52:7)+NH4		866.726	38.9714		3.47E+01 (2.42E+01 - 5.01E+01)	3.87E+01 (2.72E+01 - 4.89E+01)		3.03E+01 (2.24E+01 - 3.86E+01)	3.07E+01 (2.64E+01 - 4.27E+01)		5.45E+01 (4.25E+01 - 7.41E+01)	5.29E+01 (4.14E+01 - 7.78E+01)		5.82E+01 (4.79E+01 - 8.17E+01)	5.21E+01 (4.17E+01 - 8.63E+01)
TG(52:6)+NH4		868.742	41.6247		2.72E+02 (1.56E+02 - 5.33E+02)	2.33E+02 (1.74E+02 - 4.84E+02)		2.47E+02 (1.71E+02 - 3.71E+02)	2.52E+02 (1.99E+02 - 3.78E+02)		3.64E+02 (2.49E+02 - 5.92E+02)	3.99E+02 (2.44E+02 - 6.17E+02)		5.45E+02 (4.18E+02 - 6.83E+02)	5.19E+02 (3.62E+02 - 7.11E+02)
TG(52:5)+NH4		870.757	43.7524		3.88E+03 (2.33E+03 - 9.08E+03)	5.70E+03 (2.36E+03 - 9.38E+03)		3.57E+03 (3.41E+03 - 4.64E+03)	3.67E+03 (3.42E+03 - 5.19E+03)		5.91E+03 (2.29E+03 - 1.26E+04)	6.93E+03 (2.57E+03 - 1.28E+04)		8.17E+03 (3.75E+03 - 1.12E+04)	7.38E+03 (4.11E+03 - 1.23E+04)
TG(52:4)+NH4		872.773	46.2352		7.57E+04 (4.67E+04 - 1.03E+05)	7.33E+04 (4.60E+04 - 9.44E+04)		6.80E+04 (5.65E+04 - 7.36E+04)	7.01E+04 (5.56E+04 - 8.20E+04)		6.20E+04 (4.42E+04 - 8.79E+04)	7.17E+04 (4.54E+04 - 9.84E+04)		7.51E+04 (5.71E+04 - 8.96E+04)	7.58E+04 (6.48E+04 - 9.03E+04)
TG(52:4)+NH4		872.772	47.8328		1.62E+03 (1.12E+03 - 2.77E+03)	1.52E+03 (1.04E+03 - 2.60E+03)		1.58E+03 (1.28E+03 - 2.41E+03)	1.79E+03 (1.45E+03 - 2.63E+03)		1.92E+03 (1.78E+03 - 3.98E+03)	2.37E+03 (1.86E+03 - 4.20E+03)		3.17E+03 (1.77E+03 - 3.88E+03)	3.21E+03 (1.80E+03 - 4.17E+03)
TG(52:3)+NH4		874.791	48.7034		1.44E+05 (1.03E+05 - 2.07E+05)	1.38E+05 (1.03E+05 - 1.90E+05)		1.40E+05 (1.29E+05 - 1.57E+05)	1.53E+05 (1.33E+05 - 1.69E+05)		1.39E+05 (1.08E+05 - 1.78E+05)	1.44E+05 (1.18E+05 - 1.89E+05)		1.56E+05 (1.34E+05 - 1.86E+05)	1.70E+05 (1.42E+05 - 1.85E+05)
TG(52:2)+NH4		876.807	50.8856		1.21E+05 (6.76E+04 - 1.74E+05)	1.30E+05 (7.04E+04 - 1.64E+05)		1.09E+05 (1.01E+05 - 1.36E+05)	1.24E+05 (1.06E+05 - 1.47E+05)		1.18E+05 (9.53E+04 - 1.52E+05)	1.18E+05 (9.68E+04 - 1.64E+05)		1.42E+05 (1.15E+05 - 1.69E+05)	1.52E+05 (1.01E+05 - 1.74E+05)
TG(52:1)+NH4		878.82	53.1091		2.64E+04 (1.02E+04 - 3.13E+04)	2.60E+04 (1.10E+04 - 3.09E+04)		2.55E+04 (1.38E+04 - 3.25E+04)	2.54E+04 (1.38E+04 - 3.61E+04)		3.28E+04 (2.30E+04 - 4.79E+04)	3.30E+04 (2.15E+04 - 4.92E+04)		3.32E+04 (2.67E+04 - 4.55E+04)	3.82E+04 (2.80E+04 - 4.79E+04)
TG(52:0)+NH4		880.836	54.6631		9.11E+02 (3.37E+02 - 1.49E+03)	8.34E+02 (4.21E+02 - 1.62E+03)		6.62E+02 (2.80E+02 - 1.13E+03)	5.80E+02 (2.93E+02 - 1.32E+03)		1.39E+03 (9.26E+02 - 2.95E+03)	1.57E+03 (1.08E+03 - 2.99E+03)		1.29E+03 (9.75E+02 - 3.13E+03)	1.64E+03 (9.71E+02 - 3.49E+03)
TG(53:5)+NH4		884.774	44.6676		2.59E+02 (1.44E+02 - 4.24E+02)	2.25E+02 (1.50E+02 - 3.83E+02)		2.07E+02 (1.89E+02 - 2.22E+02)	2.20E+02 (1.96E+02 - 2.48E+02)		2.82E+02 (1.27E+02 - 3.66E+02)	3.04E+02 (1.36E+02 - 4.13E+02)		2.44E+02 (2.04E+02 - 3.18E+02)	2.43E+02 (2.22E+02 - 3.07E+02)
TG(53:3)+NH4		888.804	49.9547		2.16E+03 (1.07E+03 - 3.72E+03)	2.06E+03 (1.18E+03 - 3.48E+03)		2.10E+03 (1.70E+03 - 2.24E+03)	2.36E+03 (1.81E+03 - 2.61E+03)		1.81E+03 (1.40E+03 - 2.83E+03)	1.77E+03 (1.35E+03 - 2.85E+03)		2.38E+03 (1.87E+03 - 2.88E+03)	2.25E+03 (1.66E+03 - 2.79E+03)
TG(53:2)+NH4		890.82	51.9147		1.30E+03 (6.66E+02 - 2.66E+03)	1.43E+03 (7.11E+02 - 2.70E+03)		1.32E+03 (9.19E+02 - 1.51E+03)	1.46E+03 (9.24E+02 - 1.68E+03)		1.22E+03 (8.53E+02 - 1.83E+03)	1.32E+03 (9.17E+02 - 1.94E+03)		1.52E+03 (1.22E+03 - 2.18E+03)	1.51E+03 (1.12E+03 - 2.29E+03)
TG(53:1)+NH4		892.836	53.8719		1.71E+02 (1.12E+02 - 4.11E+02)	2.20E+02 (1.19E+02 - 3.31E+02)		1.87E+02 (1.19E+02 - 2.21E+02)	1.81E+02 (1.17E+02 - 2.34E+02)		1.98E+02 (1.43E+02 - 4.80E+02)	1.97E+02 (1.79E+02 - 6.20E+02)		2.39E+02 (1.99E+02 - 4.27E+02)	2.57E+02 (2.05E+02 - 4.15E+02)
TG(54:7)+NH4		894.757	40.6521		7.44E+02 (4.07E+02 - 1.41E+03)	6.66E+02 (4.03E+02 - 1.27E+03)		4.81E+02 (3.84E+02 - 5.81E+02)	5.40E+02 (3.48E+02 - 7.22E+02)		8.29E+02 (3.26E+02 - 2.15E+03)	9.68E+02 (3.46E+02 - 2.22E+03)		7.86E+02 (5.26E+02 - 1.24E+03)	7.37E+02 (5.62E+02 - 1.16E+03)
TG(54:7)+NH4		894.756	42.6589		6.06E+02 (3.24E+02 - 9.86E+02)	5.68E+02 (3.32E+02 - 9.73E+02)		5.25E+02 (3.99E+02 - 7.53E+02)	6.07E+02 (4.37E+02 - 8.78E+02)		8.30E+02 (5.86E+02 - 1.32E+03)	8.59E+02 (6.00E+02 - 1.48E+03)		1.14E+03 (7.71E+02 - 1.47E+03)	1.19E+03 (8.12E+02 - 1.56E+03)
TG(54:6)+NH4		896.774	45.1921		5.15E+03 (3.09E+03 - 1.24E+04)	4.46E+03 (3.32E+03 - 1.24E+04)		4.39E+03 (3.43E+03 - 9.66E+03)	5.14E+03 (3.80E+03 - 1.03E+04)		9.91E+03 (4.37E+03 - 1.26E+04)	9.23E+03 (4.53E+03 - 1.43E+04)		1.32E+04 (1.07E+04 - 1.52E+04)	1.42E+04 (9.55E+03 - 1.57E+04)
TG(54:5)+NH4		898.788	46.1842		2.44E+04 (1.62E+04 - 4.98E+04)	2.49E+04 (1.57E+04 - 5.10E+04)		1.91E+04 (1.50E+04 - 2.53E+04)	2.08E+04 (1.90E+04 - 2.46E+04)		2.43E+04 (1.64E+04 - 4.16E+04)	2.65E+04 (1.74E+04 - 4.14E+04)		2.45E+04 (1.74E+04 - 3.62E+04)	2.83E+04 (1.80E+04 - 3.51E+04)
TG(54:5)+NH4		898.788	47.7487		1.28E+04 (8.64E+03 - 1.84E+04)	1.21E+04 (9.16E+03 - 1.77E+04)		1.28E+04 (9.72E+03 - 1.52E+04)	1.42E+04 (1.08E+04 - 1.67E+04)		1.67E+04 (1.04E+04 - 2.01E+04)	1.69E+04 (1.09E+04 - 2.15E+04)		2.12E+04 (1.43E+04 - 2.32E+04)	1.86E+04 (1.59E+04 - 2.57E+04)
TG(54:4)+NH4		900.804	48.6628		3.69E+04 (2.28E+04 - 6.16E+04)	3.43E+04 (2.27E+04 - 6.48E+04)		2.88E+04 (2.29E+04 - 3.18E+04)	3.09E+04 (2.35E+04 - 3.48E+04)		3.16E+04 (2.59E+04 - 4.35E+04)	3.37E+04 (2.61E+04 - 4.58E+04)		3.56E+04 (2.93E+04 - 4.22E+04)	3.63E+04 (2.96E+04 - 4.36E+04)
TG(54:4)+NH4		900.804	50.3455		8.90E+02 (7.76E+02 - 1.61E+03)	9.20E+02 (7.01E+02 - 1.57E+03)		9.74E+02 (7.44E+02 - 1.21E+03)	9.80E+02 (7.79E+02 - 1.27E+03)		1.18E+03 (9.94E+02 - 1.66E+03)	1.29E+03 (1.07E+03 - 1.63E+03)		1.56E+03 (1.01E+03 - 1.84E+03)	1.56E+03 (9.73E+02 - 2.00E+03)
TG(54:2)+NH4		904.836	53.0269		1.57E+04 (1.16E+04 - 3.05E+04)	1.78E+04 (1.13E+04 - 3.00E+04)		1.58E+04 (1.33E+04 - 2.00E+04)	1.75E+04 (1.31E+04 - 2.17E+04)		1.91E+04 (1.59E+04 - 3.19E+04)	2.21E+04 (1.94E+04 - 3.42E+04)		2.40E+04 (2.21E+04 - 3.08E+04)	2.94E+04 (1.98E+04 - 3.23E+04)
TG(54:1)+NH4		906.851	54.5889		1.80E+03 (8.87E+02 - 2.62E+03)	2.08E+03 (1.02E+03 - 2.55E+03)		1.12E+03 (8.56E+02 - 1.60E+03)	1.32E+03 (7.23E+02 - 1.79E+03)		2.56E+03 (1.49E+03 - 4.68E+03)	2.70E+03 (2.12E+03 - 8.77E+03)		3.30E+03 (2.02E+03 - 6.37E+03)	4.31E+03 (2.11E+03 - 7.03E+03)
TG(54:0)+NH4		908.866	55.6759		1.29E+02 (7.24E+01 - 3.10E+02)	1.19E+02 (7.81E+01 - 3.01E+02)		8.63E+01 (5.99E+01 - 1.27E+02)	1.12E+02 (4.95E+01 - 1.31E+02)		1.96E+02 (1.19E+02 - 5.35E+02)	2.53E+02 (1.51E+02 - 6.35E+02)		2.76E+02 (1.31E+02 - 4.79E+02)	2.39E+02 (1.47E+02 - 5.96E+02)
TG(55:2)+NH4		918.853	53.7633		6.78E+01 (4.79E+01 - 1.48E+02)	8.63E+01 (4.75E+01 - 1.40E+02)		6.83E+01 (5.33E+01 - 7.75E+01)	8.22E+01 (5.61E+01 - 8.39E+01)		8.43E+01 (6.72E+01 - 1.40E+02)	8.55E+01 (7.27E+01 - 1.62E+02)		1.17E+02 (6.91E+01 - 1.39E+02)	1.33E+02 (8.25E+01 - 1.44E+02)
TG(55:1)+NH4		920.869	55.0915		3.55E+01 (2.82E+01 - 7.65E+01)	4.03E+01 (2.98E+01 - 5.66E+01)		2.71E+01 (2.33E+01 - 3.28E+01)	3.27E+01 (2.68E+01 - 4.31E+01)		4.91E+01 (2.96E+01 - 8.27E+01)	5.27E+01 (4.20E+01 - 1.15E+02)		4.56E+01 (2.66E+01 - 8.35E+01)	6.79E+01 (3.70E+01 - 7.92E+01)
TG(56:8)+NH4		920.772	43.7513		9.58E+02 (5.46E+02 - 1.21E+03)	9.42E+02 (5.57E+02 - 1.23E+03)		1.17E+03 (7.02E+02 - 1.42E+03)	1.29E+03 (8.01E+02 - 1.47E+03)		1.01E+03 (7.77E+02 - 1.47E+03)	1.08E+03 (7.36E+02 - 1.64E+03)		2.11E+03 (1.09E+03 - 2.60E+03)	2.17E+03 (1.07E+03 - 2.62E+03)
TG(56:7)+NH4		922.79	45.0828		5.22E+03 (2.68E+03 - 1.12E+04)	5.97E+03 (2.87E+03 - 1.06E+04)		4.08E+03 (2.57E+03 - 4.88E+03)	4.36E+03 (3.01E+03 - 6.77E+03)		4.29E+03 (3.30E+03 - 5.29E+03)	4.43E+03 (3.55E+03 - 8.61E+03)		9.25E+03 (8.50E+03 - 1.04E+04)	9.51E+03 (5.48E+03 - 1.10E+04)
TG(56:7)+NH4		922.787	46.4869		1.07E+03 (5.61E+02 - 1.64E+03)	1.02E+03 (6.57E+02 - 1.77E+03)		1.19E+03 (8.79E+02 - 1.72E+03)	1.32E+03 (9.45E+02 - 1.99E+03)		1.40E+03 (9.10E+02 - 1.94E+03)	1.65E+03 (1.14E+03 - 2.03E+03)		2.50E+03 (1.62E+03 - 2.98E+03)	2.36E+03 (1.65E+03 - 2.83E+03)
TG(56:6)+NH4		924.805	47.6333		9.63E+03 (3.52E+03 - 1.13E+04)	9.62E+03 (3.53E+03 - 1.16E+04)		5.61E+03 (3.78E+03 - 8.86E+03)	6.92E+03 (4.31E+03 - 9.62E+03)		5.51E+03 (4.82E+03 - 8.69E+03)	6.54E+03 (4.44E+03 - 1.10E+04)		1.12E+04 (8.35E+03 - 1.27E+04)	1.13E+04 (8.65E+03 - 1.32E+04)
TG(56:5)+NH4		926.819	49.537		1.59E+03 (1.01E+03 - 2.90E+03)	1.61E+03 (1.06E+03 - 2.77E+03)		1.53E+03 (1.26E+03 - 1.86E+03)	1.54E+03 (1.41E+03 - 2.05E+03)		1.68E+03 (1.20E+03 - 2.04E+03)	1.69E+03 (1.22E+03 - 2.30E+03)		2.74E+03 (1.48E+03 - 3.12E+03)	2.25E+03 (1.61E+03 - 3.33E+03)
TG(56:5)+NH4		926.821	50.2707		3.50E+03 (2.02E+03 - 4.87E+03)	3.69E+03 (2.30E+03 - 4.85E+03)		3.91E+03 (2.52E+03 - 4.54E+03)	4.15E+03 (2.94E+03 - 5.47E+03)		3.69E+03 (3.26E+03 - 4.35E+03)	3.50E+03 (3.40E+03 - 4.97E+03)		4.88E+03 (4.23E+03 - 8.43E+03)	5.41E+03 (4.20E+03 - 8.09E+03)
TG(56:4)+NH4		928.836	52.5198		1.42E+02 (8.75E+01 - 2.06E+02)	1.12E+02 (7.41E+01 - 2.25E+02)		1.45E+02 (1.21E+02 - 1.95E+02)	1.55E+02 (1.31E+02 - 2.25E+02)		1.68E+02 (1.35E+02 - 2.52E+02)	1.82E+02 (1.50E+02 - 2.38E+02)		2.62E+02 (1.63E+02 - 3.26E+02)	2.72E+02 (1.53E+02 - 3.92E+02)
TG(56:3)+NH4		930.852	52.9528		7.57E+02 (5.24E+02 - 1.29E+03)	8.01E+02 (5.45E+02 - 1.23E+03)		5.00E+02 (3.74E+02 - 6.17E+02)	5.50E+02 (3.77E+02 - 6.59E+02)		7.38E+02 (5.35E+02 - 1.15E+03)	6.79E+02 (5.60E+02 - 1.22E+03)		8.30E+02 (6.79E+02 - 1.37E+03)	7.86E+02 (6.07E+02 - 1.26E+03)
TG(56:2)+NH4		932.867	54.4653		3.81E+02 (2.48E+02 - 7.18E+02)	3.55E+02 (2.70E+02 - 7.28E+02)		2.33E+02 (1.68E+02 - 2.80E+02)	2.61E+02 (1.48E+02 - 3.10E+02)		4.89E+02 (2.88E+02 - 7.93E+02)	4.63E+02 (3.33E+02 - 9.60E+02)		5.63E+02 (3.51E+02 - 1.20E+03)	5.18E+02 (3.82E+02 - 1.30E+03)
TG(56:1)+NH4		934.883	55.5951		1.66E+02 (1.18E+02 - 3.44E+02)	1.59E+02 (1.13E+02 - 2.90E+02)		9.67E+01 (5.76E+01 - 1.31E+02)	8.83E+01 (5.70E+01 - 1.49E+02)		2.74E+02 (1.55E+02 - 4.45E+02)	2.92E+02 (1.81E+02 - 5.68E+02)		3.05E+02 (1.47E+02 - 9.86E+02)	2.87E+02 (1.82E+02 - 1.28E+03)
TG(56:0)+NH4		936.898	56.5219		3.89E+01 (2.61E+01 - 8.14E+01)	3.78E+01 (2.63E+01 - 7.63E+01)		3.01E+01 (2.32E+01 - 4.64E+01)	2.76E+01 (2.39E+01 - 4.16E+01)		6.53E+01 (4.64E+01 - 1.73E+02)	8.32E+01 (5.45E+01 - 2.23E+02)		5.53E+01 (3.30E+01 - 1.40E+02)	1.09E+02 (4.98E+01 - 1.89E+02)
TG(58:10)+NH4		944.772	40.8788		3.06E+02 (1.74E+02 - 4.04E+02)	2.97E+02 (1.61E+02 - 4.02E+02)		2.17E+02 (1.97E+02 - 3.19E+02)	2.36E+02 (2.09E+02 - 3.61E+02)		3.00E+02 (1.81E+02 - 4.04E+02)	3.61E+02 (2.32E+02 - 5.05E+02)		5.09E+02 (3.08E+02 - 7.16E+02)	5.63E+02 (2.99E+02 - 7.27E+02)
TG(58:10)+NH4		944.77	42.5288		6.67E+01 (3.58E+01 - 9.72E+01)	6.41E+01 (3.76E+01 - 9.83E+01)		6.74E+01 (4.90E+01 - 1.05E+02)	7.12E+01 (5.67E+01 - 1.28E+02)		9.83E+01 (5.52E+01 - 1.72E+02)	1.06E+02 (6.04E+01 - 1.84E+02)		1.86E+02 (1.11E+02 - 2.16E+02)	1.87E+02 (8.79E+01 - 2.24E+02)
TG(58:11)+NH4		942.757	38.1716		6.21E+01 (3.22E+01 - 8.84E+01)	6.50E+01 (3.11E+01 - 1.07E+02)		5.13E+01 (4.17E+01 - 7.15E+01)	5.84E+01 (4.14E+01 - 7.36E+01)		7.81E+01 (5.32E+01 - 1.33E+02)	8.44E+01 (6.33E+01 - 1.51E+02)		1.21E+02 (7.44E+01 - 1.49E+02)	9.74E+01 (8.19E+01 - 1.59E+02)
TG(58:9)+NH4		946.787	43.8589		5.45E+02 (4.27E+02 - 8.18E+02)	5.51E+02 (4.55E+02 - 8.32E+02)		5.36E+02 (4.00E+02 - 6.40E+02)	6.32E+02 (4.36E+02 - 7.67E+02)		7.63E+02 (5.20E+02 - 8.84E+02)	8.13E+02 (5.12E+02 - 9.79E+02)		1.12E+03 (9.15E+02 - 1.44E+03)	1.13E+03 (8.84E+02 - 1.50E+03)
TG(58:5)+NH4		954.849	51.7627		1.41E+02 (8.55E+01 - 2.02E+02)	1.34E+02 (1.03E+02 - 1.99E+02)		1.26E+02 (9.86E+01 - 1.47E+02)	1.31E+02 (1.06E+02 - 1.69E+02)		1.55E+02 (1.08E+02 - 1.97E+02)	1.73E+02 (1.31E+02 - 2.12E+02)		2.39E+02 (1.44E+02 - 2.78E+02)	2.21E+02 (1.53E+02 - 3.09E+02)
TG(58:5)+NH4		954.851	52.3934		4.93E+01 (3.77E+01 - 6.79E+01)	5.20E+01 (3.72E+01 - 7.09E+01)		4.80E+01 (3.43E+01 - 5.45E+01)	4.06E+01 (3.29E+01 - 6.85E+01)		5.69E+01 (4.51E+01 - 6.51E+01)	6.27E+01 (5.19E+01 - 7.76E+01)		7.83E+01 (4.76E+01 - 9.55E+01)	7.19E+01 (5.39E+01 - 1.12E+02)
TG(60:11)+NH4		970.786	42.4928		6.70E+01 (5.60E+01 - 9.66E+01)	8.09E+01 (4.93E+01 - 9.47E+01)		7.57E+01 (5.73E+01 - 1.18E+02)	8.28E+01 (5.84E+01 - 1.28E+02)		9.29E+01 (6.15E+01 - 1.55E+02)	1.08E+02 (6.10E+01 - 1.47E+02)		1.77E+02 (1.11E+02 - 2.18E+02)	1.78E+02 (1.37E+02 - 2.16E+02)
TG(60:10)+NH4		972.8	44.9023		5.80E+01 (4.10E+01 - 8.34E+01)	6.22E+01 (4.26E+01 - 8.14E+01)		6.21E+01 (4.50E+01 - 8.25E+01)	7.80E+01 (4.57E+01 - 8.23E+01)		6.57E+01 (4.90E+01 - 9.21E+01)	6.04E+01 (4.53E+01 - 8.93E+01)		1.38E+02 (8.59E+01 - 1.86E+02)	1.23E+02 (9.91E+01 - 1.63E+02)
TG(60:3)+NH4		986.914	55.5957		6.99E+01 (4.32E+01 - 1.53E+02)	6.69E+01 (3.69E+01 - 1.59E+02)		3.17E+01 (2.11E+01 - 4.27E+01)	3.58E+01 (2.80E+01 - 6.18E+01)		8.06E+01 (5.74E+01 - 1.23E+02)	1.02E+02 (6.82E+01 - 1.37E+02)		5.73E+01 (5.01E+01 - 3.33E+02)	7.68E+01 (5.83E+01 - 4.29E+02)
TG(60:1)+NH4		990.945	57.1568		2.71E+01 (2.11E+01 - 6.17E+01)	3.46E+01 (2.23E+01 - 4.05E+01)		1.75E+01 (1.33E+01 - 2.87E+01)	1.92E+01 (1.59E+01 - 2.28E+01)		4.05E+01 (2.76E+01 - 7.01E+01)	6.11E+01 (5.07E+01 - 1.26E+02)		3.80E+01 (2.21E+01 - 1.37E+02)	4.70E+01 (3.69E+01 - 2.80E+02)
TG(61:6)+NH4		994.882	49.5213		5.39E+01 (3.42E+01 - 6.37E+01)	4.40E+01 (3.94E+01 - 6.07E+01)		4.50E+01 (3.40E+01 - 5.14E+01)	4.63E+01 (3.89E+01 - 5.55E+01)		4.79E+01 (3.80E+01 - 5.25E+01)	5.22E+01 (4.19E+01 - 5.61E+01)		5.80E+01 (4.32E+01 - 7.17E+01)	5.98E+01 (5.21E+01 - 7.11E+01)
ether TG
TG(50:1e)+NH4		836.808	53.5816		7.78E+01 (6.05E+01 - 1.16E+02)	8.04E+01 (7.70E+01 - 1.32E+02)		7.20E+01 (3.41E+01 - 9.50E+01)	1.09E+02 (4.38E+01 - 1.41E+02)		1.01E+02 (6.91E+01 - 1.54E+02)	1.11E+02 (7.39E+01 - 1.55E+02)		7.10E+01 (6.01E+01 - 1.19E+02)	7.92E+01 (5.81E+01 - 1.39E+02)
TG(52:1e)+NH4		864.84	54.9534		4.95E+01 (3.86E+01 - 9.08E+01)	5.29E+01 (4.49E+01 - 6.20E+01)		4.36E+01 (3.37E+01 - 5.52E+01)	4.53E+01 (2.77E+01 - 6.62E+01)		6.80E+01 (4.17E+01 - 9.94E+01)	7.80E+01 (5.84E+01 - 1.38E+02)		4.74E+01 (3.49E+01 - 6.56E+01)	5.82E+01 (4.17E+01 - 7.21E+01)
TG(52:2e)+NH4		862.827	53.4689		7.33E+01 (5.28E+01 - 1.02E+02)	7.93E+01 (5.80E+01 - 9.76E+01)		6.80E+01 (3.24E+01 - 8.64E+01)	8.02E+01 (4.15E+01 - 1.02E+02)		7.55E+01 (5.94E+01 - 1.16E+02)	9.41E+01 (6.27E+01 - 1.33E+02)		5.87E+01 (4.42E+01 - 1.02E+02)	6.18E+01 (3.42E+01 - 9.92E+01)
oxidized TG
TG(54:6)+O+NH4		912.769	41.1072		5.79E+01 (4.81E+01 - 9.77E+01)	7.07E+01 (4.42E+01 - 9.66E+01)		8.05E+01 (4.61E+01 - 1.01E+02)	8.09E+01 (5.50E+01 - 1.03E+02)		6.32E+01 (4.26E+01 - 8.35E+01)	7.30E+01 (4.87E+01 - 9.01E+01)		6.20E+01 (4.52E+01 - 8.68E+01)	7.40E+01 (5.48E+01 - 8.53E+01)
N.D. indicate that MS2 or MS3 fragment ion was not detected in structual analysis using LTQ Orbitrap.
