# Supplementary material for: Plasma and Serum Lipidomics of Healthy White Adults Shows Characteristic Profiles by Subjects’ Gender and Age
Source: PLoS One. 2014 Mar 14;9(3):e91806. doi: 10.1371/journal.pone.0091806 (PMC3954792; doi:10.1371/journal.pone.0091806)
Supplement: Table S3 — Matrix-associated differences (fold changes and statistical analysis) in the levels of lipid metabolites. (XLSX) [file pone.0091806.s003.xlsx]

## Sheet: suppl. Table 3
Table S3. Matrix-associated differences (fold changes and statistical analysis) in the levels of lipid metabolites.
		Plasma vs Serum (Young Male)			Plasma vs Serum (Young Female)			Plasma vs Serum (Elderly Male)			Plasma vs Serum (Elderly Female)
		Median fold	p value		Median fold	p value		Median fold	p value		Median fold	p value
		Change	Wilcoxon		Change	Wilcoxon		Change	Wilcoxon		Change	Wilcoxon
		(Serum/Plasma)	test		(Serum/Plasma)	test		(Serum/Plasma)	test		(Serum/Plasma)	test
Lysophosphatidylcholine (lysoPC)
lysoPC(16:1)+HCOO		1.37	1.83E-04***		1.74	6.10E-05***		1.52	1.22E-04***		1.25	4.27E-04***
lysoPC(16:0)+HCOO		1.55	1.22E-04***		1.80	6.10E-05***		1.52	6.10E-05***		1.47	1.53E-03**
lysoPC(17:0)+HCOO		1.52	6.10E-05***		1.79	6.10E-05***		1.65	6.10E-05***		1.78	2.62E-03**
lysoPC(18:2)+HCOO		1.05	0.073		1.17	1.16E-03**		1.09	1.25E-02*		1.06	0.89
lysoPC(18:1)+HCOO		1.33	6.71E-03**		1.45	6.10E-05***		1.22	6.10E-05***		1.32	6.10E-04***
lysoPC(18:0)+HCOO		1.55	1.22E-04***		1.99	6.10E-05***		1.61	6.10E-05***		1.61	1.16E-03**
lysoPC(20:4)+HCOO		1.37	5.37E-03**		1.48	6.10E-05***		1.35	3.05E-04***		1.48	5.37E-03**
lysoPC(20:3)+HCOO		1.14	0.121		1.19	1.83E-04***		1.13	8.36E-03**		1.20	3.53E-02*
lysoPC(22:6)+HCOO		1.22	4.13E-02*		1.69	6.10E-05***		1.28	6.71E-03**		1.29	1.81E-02*
Phatidylcholine (PC)
PC(32:2)+HCOO	14:0-18:2 PC	0.83	0.121		0.82	0.277		0.90	3.53E-02*		0.83	2.01E-03**
PC(32:1)+HCOO	16:0-16:1/14:0-18:1 PC	0.85	2.62E-03**		0.68	3.05E-04***		1.00	4.13E-02*		0.68	5.37E-03**
PC(32:0)+HCOO	16:0-16:0 PC	0.88	0.303		1.03	0.639		0.97	0.804		0.85	0.0946
PC(33:2)+HCOO	15:0-18:2 PC	0.86	1.51E-02*		1.05	0.229		1.09	0.169		0.87	4.13E-02*
PC(34:4)+HCOO	14:0-20:4 PC	0.9	0.33		0.92	0.107		1.20	0.208		0.95	3.02E-02*
PC(34:2)+HCOO	16:0-18:2 PC	0.92	0.0946		0.93	0.252		0.96	0.208		0.86	8.54E-04***
PC(34:1)+HCOO	16:0-18:1 PC	0.95	0.169		0.97	0.303		1.05	0.89		0.95	2.01E-03**
PC(34:0)+HCOO	16:0-18:0 PC	1.20	0.762		1.18	1.25E-02*		1.19	3.36E-03**		0.96	0.135
PC(35:4)+HCOO	15:0-20:4 PC	0.98	0.135		0.93	0.934		1.08	0.107		0.93	2.15E-02*
PC(35:3)+HCOO	17:1-18:2 PC	0.95	0.804		0.95	0.524		0.93	0.804		0.72	8.54E-04***
PC(36:5)+HCOO	18:2-18:3 PC	0.80	0.524		0.81	0.762		1.10	0.421		0.94	0.073
PC(36:5)+HCOO	16:1-20:4 PC	0.91	0.188		1.01	0.0833		1.06	0.33		0.91	1.51E-02*
PC(36:5)+HCOO	16:0-20:5 PC	0.83	0.169		1.02	0.33		1.07	0.847		0.81	2.01E-03**
PC(36:4)+HCOO	18:2-18:2 PC	1.03	0.0946		1.03	0.454		1.00	0.599		0.80	6.71E-03**
PC(36:4)+HCOO	16:0-20:4 PC	0.95	0.151		1.02	0.762		0.95	0.277		0.91	2.01E-03**
PC(36:3)+HCOO	16:0-20:3 PC	1.00	0.303		1.09	0.454		1.13	0.135		1.06	0.229
PC(36:2)+HCOO	18:0-18:2 PC	0.92	0.0637		1.01	0.389		0.94	0.277		0.95	8.54E-04***
PC(36:1)+HCOO	18:0-18:1 PC	1.03	0.421		1.04	0.978		1.18	0.169		0.86	0.107
PC(37:2)+HCOO	19:0-18:2 PC	0.94	0.389		1.01	0.0554		1.11	0.135		0.91	0.151
PC(38:6)+HCOO	18:2-20:4 PC	1.06	0.303		1.09	0.389		1.08	0.169		0.85	1.53E-03**
PC(38:6)+HCOO	16:0-22:6 PC	1.02	0.72		1.03	0.524		0.97	0.073		0.95	0.252
PC(38:5)+HCOO	16:0-22:5/18:1-20:4 PC	0.99	0.421		1.02	0.489		1.18	0.107		0.95	0.188
PC(38:5)+HCOO	18:0-20:5	1.02	0.762		1.15	0.0833		1.12	0.277		1.04	0.421
PC(38:4)+HCOO	16:0-22:4 PC	0.95	0.359		1.19	0.277		0.96	0.107		1.03	0.151
PC(38:4)+HCOO	18:0-20:4 PC	1.05	0.524		1.08	0.421		1.08	0.679		0.96	0.0946
PC(38:3)+HCOO	18:1-20:2/18:2-20:1 PC	1.10	0.934		1.03	0.762		1.17	2.15E-02*		0.89	4.13E-02*
PC(38:3)+HCOO	18:0-20:3 PC	0.99	0.978		1.08	0.934		1.20	1.25E-02*		1.01	0.978
PC(40:8)+HCOO	18:2-22:6/20:4-20:4 PC	1.06	0.679		1.08	0.389		1.00	0.33		0.98	0.489
PC(40:7)+HCOO	18:1-22:6 PC	1.01	0.804		1.17	3.53E-02*		1.04	0.33		0.85	0.639
PC(40:6)+HCOO	18:1-22:5 PC	1.20	0.252		0.94	0.639		1.14	4.27E-03**		0.92	0.599
PC(40:6)+HCOO	18:0-22:6 PC	1.21	0.389		1.09	0.121		1.00	0.0554		1.05	0.188
PC(40:5)+HCOO	20:1-20:4 PC	1.14	0.847		1.03	0.277		1.24	2.01E-03**		1.02	0.489
PC(40:5)+HCOO	18:0-22:5 PC	0.91	0.277		1.22	0.303		1.00	0.107		0.95	0.421
PC(40:4)+HCOO	18:0-22:4 PC	0.95	0.978		1.02	0.277		1.37	2.01E-03**		1.11	0.72
ether PC
PC(32:0p)+HCOO	16:0p-16:0 PC	0.83	0.33		1.04	0.762		1.15	0.277		0.97	0.107
PC(32:0e)+HCOO	16:0e-16:0 PC	0.97	0.0833		1.06	0.72		1.03	0.524		0.95	1.03E-02*
PC(34:2p)+HCOO	16:0p-18:2 PC	1.03	0.804		1.14	0.561		0.98	0.359		1.04	0.0946
PC(34:2e)+HCOO	16:0e-18:2 PC	0.98	0.208		0.93	0.847		1.18	3.02E-02*		0.96	3.53E-02*
PC(34:1p)+HCOO	16:0p-18:1/18:1p-16:0 PC	1.06	0.359		0.94	0.33		1.10	8.36E-03**		0.90	0.188
PC(34:1e)+HCOO	16:0e-18:1/18:1e-16:0 PC	0.93	0.169		1.10	0.599		1.05	0.169		0.90	2.15E-02*
PC(36:4p)+HCOO	16:0p-20:4 PC	0.92	0.804		1.01	0.188		1.05	1.51E-02*		0.93	0.421
PC(36:4e)+HCOO	16:0e-20:4 PC	0.95	1		1.03	0.599		1.05	4.13E-02*		0.87	0.0554
PC(36:3p)+HCOO	18:1p-18:2 PC	1.03	0.679		1.19	0.151		0.91	0.561		0.96	0.847
PC(36:3e)+HCOO	18:1e-18:2 PC	1.00	0.359		1.15	0.188		1.14	4.79E-02*		0.98	0.0637
PC(36:2p)+HCOO	18:0p-18:2 PC	0.97	0.762		1.04	0.121		1.09	8.36E-03**		1.05	0.359
PC(36:2e)+HCOO	18:0e-18:2 PC	0.94	0.524		1.06	0.762		1.03	0.252		1.05	0.073
PC(38:5p)+HCOO	18:1p-20:4 PC	1.13	0.978		0.99	0.229		0.89	0.252		0.95	0.121
PC(38:5e)+HCOO	18:1e-20:4 PC	0.92	0.489		1.19	0.804		1.09	3.53E-02*		0.95	0.073
PC(38:4p)+HCOO	18:0p-20:4 PC	1.05	0.421		0.93	0.89		1.20	2.01E-03**		0.97	0.208
PC(38:4e)+HCOO	16:0e-22:4 PC	0.96	0.639		1.21	0.421		1.12	0.0833		1.03	0.454
PC(38:4e)+HCOO	18:0e-20:4 PC	0.95	0.978		1.18	0.0946		1.12	6.10E-05***		0.96	0.33
PC(40:5e)+HCOO	20:1e-20:4/18:0e-22:5 PC	1.03	0.599		0.98	0.359		1.16	0.121		1.03	3.53E-02*
PC(40:4e)+HCOO	20:0e-20:4 PC	1.09	0.847		0.99	0.277		1.01	0.524		0.96	0.33
PC(42:5e)+HCOO	22:1e-20:4/20:0e-22:5 PC	1.09	0.524		1.16	0.762		1.17	0.277		0.94	0.208
Lysophosphatidylethanolamine (lysoPE)
lysoPE(18:2)-H		0.96	0.89		1.00	0.169		1.08	0.978		1.04	0.229
lysoPE(20:4)-H		0.98	0.934		0.94	0.389		1.03	0.561		0.87	0.208
Phatidylethanolamine (PE)
PE(34:2)-H	16:0-18:2 PE	1.03	0.303		0.97	0.135		1.14	0.489		0.98	0.208
PE(34:1)-H	16:0-18:1 PE	0.95	0.277		0.93	1		1.22	0.421		0.87	0.208
PE(36:3)-H	18:1-18:2 PE	0.87	0.0554		1.07	0.208		1.13	0.934		0.81	0.934
PE(36:2)-H	18:0-18:2 PE	0.94	3.53E-02*		0.96	0.561		1.06	0.151		0.88	0.135
PE(36:1)-H	18:0-18:1 PE	0.97	0.169		0.96	0.72		0.94	0.599		0.92	0.252
PE(38:6)-H	16:0-22:6 PE	0.84	0.169		0.93	0.277		1.12	0.389		0.96	0.0833
PE(38:5)-H	18:1-20:4 PE	0.93	0.934		0.97	0.89		1.05	1.25E-02*		1.19	1.81E-02*
PE(38:4)-H	18:0-20:4 PE	1.10	0.359		0.99	0.421		1.03	0.0554		0.88	0.89
PE(40:6)-H	18:0-22:6 PE	0.95	0.89		1.02	0.639		1.07	0.524		1.00	0.0833
ether PE
PE(34:2p)-H	16:0p-18:2 PE	0.95	0.599		1.01	0.0833		1.00	4.13E-02*		1.12	0.229
PE(36:4p)-H	16:0p-20:4 PE	1.04	0.847		1.06	0.188		1.10	3.53E-02*		0.95	0.762
PE(36:2p)-H	18:0p-18:2 PE	0.98	0.934		1.09	0.151		1.09	1.03E-02*		0.95	0.135
PE(38:6p)-H	18:2p-20:4 PE	1.02	0.389		1.01	0.359		1.31	8.54E-04***		0.95	0.72
PE(38:5p)-H	16:0p-22:5/18:1p-20:4 PE	0.99	0.599		1.02	0.89		1.23	3.36E-03**		1.08	0.679
PE(38:4p)-H	18:0p-20:4 PE	1.03	0.599		1.11	0.135		1.03	2.56E-02*		1.00	0.489
PE(40:7p)-H	N.D.	1.00	0.847		1.00	0.847		1.10	3.36E-03**		1.05	0.489
PE(40:6p)-H	18:0p-22:6 PE	1.19	1		1.05	0.454		1.02	1.25E-02*		0.96	0.454
PE(40:6e)-H	18:0e-22:6 PE	1.09	0.804		1.07	0.169		1.12	0.0637		1.17	0.934
Phosphatidylinositol (PI)
PI(34:2)-H	16:0-18:2 PI	0.97	0.151		0.97	0.639		0.82	0.188		0.88	2.01E-03**
PI(36:1)-H	18:0-18:1 PI	1.00	0.489		1.01	0.804		1.09	0.188		1.03	0.073
PI(36:4)-H	16:0-20:4 PI	1.12	0.252		0.94	0.561		1.08	0.359		0.95	0.208
PI(36:3)-H	18:1-18:2 PI	0.98	0.121		1.00	0.847		1.01	3.53E-02*		0.85	0.169
PI(36:2)-H	18:0-18:2 PI	1.14	0.847		1.10	0.303		1.10	0.0554		0.91	0.33
PI(38:5)-H	18:1-20:4 PI	1.14	0.277		1.31	0.934		1.04	0.135		0.85	1.25E-02*
PI(38:4)-H	18:0-20:4 PI	1.06	0.934		1.05	0.107		1.11	0.0554		1.04	0.679
PI(38:3)-H	18:0-20:3 PI	1.01	0.489		0.93	0.359		1.12	0.151		0.92	0.679
Sphingomyelin (SM)
SM(33:1)+HCOO	d17:1-16:0 SM	1.06	0.359		1.11	0.073		1.11	0.107		1.12	0.599
SM(34:2)+HCOO	d18:2-16:0 SM	0.97	0.599		1.01	0.135		1.05	0.229		0.93	1.51E-02*
SM(34:1)+HCOO	d18:1-16:0 SM	0.93	0.804		1.01	1		1.06	0.389		0.95	2.15E-02*
SM(34:0)+HCOO	d18:0-16:0 SM	1.03	0.934		1.08	0.303		1.18	6.10E-04***		0.97	4.27E-03**
SM(35:1)+HCOO	d17:1-18:0/d18:1-17:0 SM	1.09	0.934		1.11	0.229		1.06	0.561		1.06	1
SM(36:2)+HCOO	d18:2-18:0 SM	0.96	0.804		1.01	0.277		1.06	0.934		0.93	4.27E-03**
SM(36:1)+HCOO	d18:1-18:0 SM	0.95	1		1.04	0.169		1.14	3.53E-02*		0.96	0.489
SM(36:0)+HCOO	d18:0-18:0 SM	0.92	0.151		1.06	0.454		1.04	0.454		0.98	0.934
SM(38:2)+HCOO	d18:1-20:1 SM	1.00	0.978		1.09	4.79E-02*		1.16	0.229		0.87	0.277
SM(38:1)+HCOO	d18:1-20:0 SM	1.02	0.934		1.14	0.169		1.16	2.62E-03**		0.95	0.359
SM(39:1)+HCOO	d16:1-23:0/d17:1-22:0 SM	1.10	1		1.11	0.33		1.12	4.13E-02*		0.98	0.804
SM(40:3)+HCOO	d18:2-22:1 SM	1.11	0.934		1.21	0.107		0.97	0.208		1.05	0.762
SM(40:2)+HCOO	d18:2-22:0 SM	1.05	0.934		1.13	0.135		1.17	3.02E-02*		0.98	0.303
SM(40:1)+HCOO	d18:1-22:0 SM	1.07	0.524		0.98	0.359		1.15	1.16E-03**		1.08	0.524
SM(40:0)+HCOO	d18:0-22:0 SM	1.2	0.389		1.05	0.121		1.27	2.01E-03**		0.92	0.208
SM(41:2)+HCOO	d18:2-23:0 SM	1.05	0.762		1.14	0.188		1.21	0.188		0.99	1
SM(41:1)+HCOO	d18:1-23:0 SM	0.97	0.804		0.98	0.679		1.12	4.27E-03**		1.02	0.073
SM(42:4)+HCOO	d18:2-24:2 SM	1.05	0.0833		1.13	0.188		1.15	0.135		1.01	0.599
SM(42:3)+HCOO	d18:2-24:1 SM	0.98	0.934		1.00	0.107		1.13	2.15E-02*		1.14	0.679
SM(42:2)+HCOO	d18:1-24:1 SM	1.02	0.72		1.12	2.15E-02*		1.19	1.53E-03**		1.03	0.599
SM(42:1)+HCOO	d18:0-24:1 SM	1.01	0.679		1.16	0.0833		1.20	1.51E-02*		1.10	0.489
SM(42:1)+HCOO	d18:1-24:0 SM	1.03	0.599		1.10	0.303		1.17	1.53E-03**		1.13	0.073
Ceramide (Cer)
Cer(34:1)+HCOO	N.D.	1.01	0.489		0.98	4.79E-02*		1.06	0.599		0.96	1
Cer(40:1)+HCOO	d18:1-22:0 Cer	0.95	0.762		0.94	0.804		1.17	4.13E-02*		1.01	0.599
Cer(41:1)+HCOO	d18:1-23:0 Cer	0.97	0.151		1.01	0.33		0.99	0.389		0.95	0.0946
Cer(42:3)+HCOO	N.D.	1.08	0.599		0.98	0.804		1.24	0.208		1.05	0.762
Cer(42:2)+HCOO	d18:1-24:1 Cer	0.95	0.639		1.20	0.229		1.21	3.36E-03**		1.05	0.389
Cer(42:2)+HCOO	N.D.	1.06	0.978		1.08	0.639		1.16	0.208		1.14	0.208
Cer(42:1)+HCOO	d18:1-24:0 Cer	0.95	0.762		1.03	0.454		1.42	4.27E-03**		1.08	0.188
Cerebroside (CB)
mono-hex CB(34:1)+HCOO	N.D.	0.98	0.561		1.14	0.229		1.20	4.27E-04***		1.13	1.25E-02*
mono-hex CB(40:1)+HCOO	d18:1-22:0 mono-hex CB	0.87	0.489		1.15	0.599		1.18	1.53E-03**		1.08	0.107
mono-hex CB(41:1)+HCOO	d18:1-23:0 mono-hex CB	0.83	0.847		1.19	0.135		1.15	1.25E-02*		1.03	0.89
mono-hex CB(42:2)+HCOO	d18:1-24:1 mono-hex CB	0.94	0.934		1.02	0.847		1.04	2.56E-02*		1.10	0.389
mono-hex CB(42:1)+HCOO	d18:1-24:0 mono-hex CB	0.82	0.524		1.06	0.389		1.10	1.03E-02*		1.02	0.804
di-hex CB(34:1)+HCOO	d18:1-16:0 di-hex CB	1.19	0.639		1.08	0.277		1.15	0.0946		1.06	0.151
di-hex CB(42:2)+HCOO	N.D.	0.82	0.639		1.22	1.03E-02*		1.02	0.679		0.94	0.934
tri-hex CB(34:1)+HCOO	N.D.	1.02	0.804		0.97	1		0.97	0.679		0.92	0.151
Cholesterol (Ch)
Ch-OH		0.94	4.79E-02*		1.00	0.89		1.02	0.524		1.01	0.421
Cholesteryl Ester (ChE)
ChE(16:0)+NH4		0.97	0.679		1.10	4.79E-02*		1.08	0.277		1.02	0.169
ChE(16:1)+NH4		1.02	0.389		1.08	1.03E-02*		1.17	4.79E-02*		1.12	0.524
ChE(18:1)+NH4		1.04	0.454		1.09	3.36E-03**		1.06	0.169		1.09	0.0637
ChE(18:2)+NH4		1.04	0.978		1.15	6.10E-04***		1.02	0.0946		1.17	4.27E-03**
ChE(18:3)+NH4		1.02	0.169		1.02	4.27E-04***		1.01	3.53E-02*		0.98	0.229
ChE(20:2)+NH4		0.96	0.599		1.18	6.71E-03**		1.33	2.56E-02*		1.06	0.303
ChE(20:3)+NH4		1.01	0.489		1.16	4.27E-04***		1.09	4.27E-03**		1.10	0.0833
ChE(20:4)+NH4		1.16	0.107		1.03	1.03E-02*		1.04	8.54E-04***		1.12	0.151
ChE(20:5)+NH4		1.11	1.51E-02*		1.17	1.53E-03**		1.26	1.83E-04***		1.08	3.02E-02*
ChE(22:4)+NH4		1.04	0.107		1.07	8.36E-03**		1.07	0.33		1.02	0.72
ChE(22:5)+NH4		0.99	0.389		1.10	2.15E-02*		1.14	2.01E-03**		1.02	0.0833
ChE(22:6)+NH4		1.14	0.151		1.16	6.10E-05***		1.17	1.03E-02*		1.07	0.073
Coenzyme Q10 (CoQ10)
CoQ10+NH4		0.97	0.489		1.10	4.79E-02*		1.07	6.71E-03**		1.02	0.121
Diacylglycerol (DG)
34:2 DG+NH4		1.72	6.10E-05***		2.36	6.10E-05***		2.10	6.10E-05***		2.34	3.05E-04***
34:2 DG+NH4		1.46	6.10E-05***		1.97	6.10E-05***		1.63	6.10E-05***		1.46	1.83E-04***
34:1 DG+NH4		1.88	6.10E-05***		2.98	6.10E-05***		2.01	6.10E-05***		2.81	4.27E-04***
34:1 DG+NH4		1.36	6.10E-05***		1.59	6.10E-05***		1.54	6.10E-05***		1.92	1.83E-04***
36:4 DG+NH4		1.21	0.121		1.05	0.0833		1.12	3.36E-03**		1.17	0.188
36:3 DG+NH4		1.76	6.10E-05***		2.79	6.10E-05***		1.97	6.10E-05***		2.21	3.05E-04***
36:2 DG+NH4		0.88	0.454		1.19	5.37E-03**		1.04	2.56E-02*		1.31	2.56E-02*
Triacylglycerol (TG)
TG(40:0)+NH4		1.01	0.847		0.60	0.135		0.94	1		0.59	2.15E-02*
TG(44:1)+NH4		1.05	0.804		0.98	3.53E-02*		0.80	0.804		0.82	0.073
TG(44:0)+NH4		0.91	0.978		1.10	0.0833		0.98	0.561		0.85	0.107
TG(46:3)+NH4		0.92	0.421		0.79	0.804		1.03	0.188		0.96	2.56E-02*
TG(46:2)+NH4		0.99	0.561		0.96	0.151		1.00	0.303		0.93	0.135
TG(46:1)+NH4		1.07	0.524		0.97	0.0637		1.03	0.978		0.85	3.02E-02*
TG(46:0)+NH4		0.89	1		1.19	0.151		1.03	0.303		0.98	0.135
TG(47:1)+NH4		1.36	0.978		0.93	0.72		0.78	0.804		0.80	0.489
TG(47:0)+NH4		0.63	0.454		1.29	0.454		0.68	0.252		1.26	0.208
TG(48:4)+NH4		0.90	0.679		1.00	0.847		0.93	0.639		0.96	0.135
TG(48:3)+NH4		0.92	0.169		0.96	0.252		0.98	0.72		0.82	0.934
TG(48:1)+NH4		0.97	0.89		0.93	0.934		0.61	0.72		0.98	0.847
TG(48:0)+NH4		0.89	0.934		1.16	4.79E-02*		1.25	0.524		0.91	0.524
TG(49:3)+NH4		1.03	0.489		1.01	2.56E-02*		0.89	0.489		1.05	0.151
TG(49:2)+NH4		0.89	0.89		1.14	0.359		0.87	0.639		0.96	4.79E-02*
TG(49:1)+NH4		1.03	0.121		0.87	0.599		1.00	0.524		1.15	0.561
TG(49:1)+NH4		1.12	0.89		1.04	0.524		0.78	0.89		0.72	4.13E-02*
TG(49:0)+NH4		1.10	0.421		1.42	0.599		1.32	0.489		0.81	0.208
TG(49:0)+NH4		0.83	0.72		1.12	0.107		1.01	0.762		0.92	0.847
TG(50:4)+NH4		0.94	0.0833		1.07	1.53E-03**		1.01	0.454		1.03	0.847
TG(50:4)+NH4		1.00	0.804		1.09	1.81E-02*		1.01	0.277		0.76	0.89
TG(50:3)+NH4		0.97	0.762		0.91	0.0554		0.93	0.33		1.08	0.804
TG(50:1)+NH4		1.07	0.639		1.05	3.53E-02*		1.26	0.847		1.04	0.679
TG(50:0)+NH4		1.09	0.978		1.16	0.679		1.18	0.804		1.01	0.489
TG(51:1)+NH4		1.16	0.934		1.16	0.0946		0.90	2.56E-02*		1.04	4.79E-02*
TG(51:2)+NH4		1.05	0.0833		1.23	1.51E-02*		0.97	0.524		0.91	0.847
TG(51:3)+NH4		0.92	0.389		1.17	1.03E-02*		1.07	0.135		1.13	0.277
TG(51:4)+NH4		0.91	1.51E-02*		1.11	2.15E-02*		1.08	0.252		1.02	0.679
TG(52:7)+NH4		1.12	0.0637		1.01	0.208		0.97	0.0833		0.90	0.33
TG(52:6)+NH4		0.86	0.762		1.02	0.135		1.10	0.303		0.95	0.804
TG(52:5)+NH4		1.47	0.978		1.03	0.073		1.17	0.229		0.90	0.89
TG(52:4)+NH4		0.97	0.804		1.03	1.51E-02*		1.16	0.151		1.01	0.679
TG(52:4)+NH4		0.94	0.934		1.13	4.13E-02*		1.24	1.51E-02*		1.01	0.277
TG(52:3)+NH4		0.96	0.639		1.10	5.37E-03**		1.04	0.107		1.08	0.561
TG(52:2)+NH4		1.08	0.978		1.14	1.51E-02*		1.00	0.121		1.07	0.454
TG(52:1)+NH4		0.98	0.934		0.99	5.37E-03**		1.01	0.0637		1.15	0.208
TG(52:0)+NH4		0.92	0.679		0.88	0.804		1.13	0.0833		1.27	0.0637
TG(53:5)+NH4		0.87	0.978		1.06	4.13E-02*		1.08	0.208		0.99	0.762
TG(53:3)+NH4		0.95	0.33		1.12	6.10E-05***		0.97	0.934		0.95	0.0946
TG(53:2)+NH4		1.10	0.934		1.11	0.073		1.08	0.0637		0.99	0.151
TG(53:1)+NH4		1.28	0.33		0.96	0.229		0.99	0.188		1.08	0.561
TG(54:7)+NH4		0.89	0.208		1.12	2.56E-02*		1.17	0.389		0.94	0.804
TG(54:7)+NH4		0.94	0.639		1.16	8.54E-04***		1.03	8.36E-03**		1.04	0.277
TG(54:6)+NH4		0.86	0.208		1.17	1.83E-04***		0.93	0.121		1.07	0.208
TG(54:5)+NH4		1.02	0.804		1.09	0.073		1.09	1.81E-02*		1.16	0.679
TG(54:5)+NH4		0.95	0.762		1.11	2.15E-02*		1.01	4.13E-02*		0.88	0.188
TG(54:4)+NH4		0.93	0.599		1.07	0.121		1.07	0.561		1.02	0.524
TG(54:4)+NH4		1.03	0.639		1.01	0.169		1.09	0.303		1.00	0.599
TG(54:2)+NH4		1.13	0.89		1.10	0.0637		1.16	3.05E-04***		1.23	0.0637
TG(54:1)+NH4		1.15	0.89		1.18	0.252		1.05	3.05E-04***		1.30	0.0554
TG(54:0)+NH4		0.92	0.804		1.30	0.639		1.29	0.0833		0.87	4.79E-02*
TG(55:2)+NH4		1.27	0.277		1.20	0.0554		1.01	1.25E-02*		1.14	0.229
TG(55:1)+NH4		1.13	0.978		1.21	0.389		1.07	0.0637		1.49	0.169
TG(56:8)+NH4		0.98	1		1.11	3.53E-02*		1.06	0.454		1.03	0.934
TG(56:7)+NH4		1.14	0.389		1.07	1.51E-02*		1.03	2.15E-02*		1.03	0.934
TG(56:7)+NH4		0.95	0.389		1.11	5.37E-03**		1.17	1.25E-02*		0.94	1
TG(56:6)+NH4		1.00	0.679		1.23	5.37E-03**		1.19	0.0833		1.01	0.679
TG(56:5)+NH4		1.01	0.762		1.01	2.56E-02*		1.01	0.0637		0.82	0.229
TG(56:5)+NH4		1.05	0.0946		1.06	1.03E-02*		0.95	0.188		1.11	0.679
TG(56:4)+NH4		0.79	0.135		1.07	2.56E-02*		1.08	0.804		1.04	0.454
TG(56:3)+NH4		1.06	0.421		1.10	0.0637		0.92	0.934		0.95	0.72
TG(56:2)+NH4		0.93	0.561		1.12	0.599		0.95	0.188		0.92	0.804
TG(56:1)+NH4		0.96	0.72		0.91	0.524		1.07	3.36E-03**		0.94	5.37E-03**
TG(56:0)+NH4		0.97	0.454		0.92	0.72		1.27	4.27E-04***		1.98	3.05E-04***
TG(58:10)+NH4		0.97	0.489		1.09	1.81E-02*		1.20	0.0554		1.11	0.33
TG(58:10)+NH4		0.96	0.804		1.06	2.15E-02*		1.07	4.13E-02*		1.00	0.489
TG(58:11)+NH4		1.05	0.524		1.14	0.639		1.08	0.073		0.80	0.762
TG(58:9)+NH4		1.01	0.121		1.18	1.53E-03**		1.07	1.81E-02*		1.01	0.0946
TG(58:5)+NH4		0.95	0.33		1.04	0.421		1.12	8.36E-03**		0.93	0.073
TG(58:5)+NH4		1.05	0.489		0.85	0.679		1.10	2.01E-03**		0.92	4.79E-02*
TG(60:11)+NH4		1.21	0.679		1.09	3.02E-02*		1.17	3.02E-02*		1.00	0.421
TG(60:10)+NH4		1.07	0.0637		1.26	0.359		0.92	0.847		0.89	0.359
TG(60:3)+NH4		0.96	0.188		1.13	0.208		1.26	4.27E-03**		1.34	1.03E-02*
TG(60:1)+NH4		1.28	0.359		1.09	0.978		1.51	8.54E-04***		1.24	1.22E-04***
TG(61:6)+NH4		0.82	0.389		1.03	0.107		1.09	0.33		1.03	0.208
ether TG
TG(50:1e)+NH4		1.03	0.0946		1.51	2.62E-03**		1.10	0.229		1.12	2.56E-02*
TG(52:1e)+NH4		1.07	0.639		1.04	0.804		1.15	3.05E-04***		1.23	1.53E-03**
TG(52:2e)+NH4		1.08	0.934		1.18	1.51E-02*		1.25	0.208		1.05	0.561
oxidized TG
TG(54:6)+O+NH4		1.22	0.978		1.00	0.0833		1.16	0.421		1.19	2.56E-02*
Linolenic acid (18:3 FA) metabolites
9-HOTrE(alpha)		0.98	0.107		0.98	0.599		1.33	8.36E-03**		1.42	2.62E-03**
13-HOTrE(alpha)		1.23	1.25E-02*		1.06	0.599		1.16	2.56E-02*		0.95	0.561
Arachidonic acids (20:4 FA) & its metabolites
Arachidonic acid		1.22	6.10E-05***		1.40	1.83E-04***		1.44	6.71E-03**		1.63	3.05E-04***
12-HHT		1.75	4.27E-04***		2.43	3.36E-03**		1.38	4.27E-04***		2.25	3.36E-03**
5-HETE		1.17	1		0.71	0.169		0.75	0.639		1.22	0.454
8-HETE		0.41	1.53E-03**		0.45	4.27E-03**		0.36	1.25E-02*		0.35	4.27E-03**
12-HETE		1.61	8.36E-03**		2.16	1.83E-04***		1.31	3.02E-02*		1.66	6.10E-04***
15-HETE		0.72	2.62E-03**		0.55	6.71E-03**		0.62	2.56E-02*		0.46	6.71E-03**
16-HETE		1.12	0.151		1.00	0.561		1.16	0.524		1.05	0.639
18-HETE		1.06	0.121		1.06	0.277		1.10	0.0833		1.12	2.15E-02*
5,15-diHETE		0.79	1.22E-04***		0.64	5.37E-03**		0.64	0.135		0.48	6.71E-03**
5,6-diHETrE		3.88	6.10E-05***		3.29	6.10E-05***		3.33	1.53E-03**		3.23	6.10E-05***
11,12-diHETrE		1.02	0.073		1.06	0.679		1.11	4.79E-02*		1.02	0.0946
14,15-diHETrE		0.99	0.0637		1.17	0.208		1.04	2.56E-02*		1.15	0.0946
Thromboxane B2		1.66	2.56E-02*		1.66	4.79E-02*		0.68	0.277		1.57	0.0554
Eicosapentaenoic acid (20:5 FA) & its metabolites
Eicosapentaenoic acid		1.38	6.10E-05***		1.35	8.54E-04***		1.39	3.36E-03**		1.79	8.54E-04***
5-HEPE		1.13	0.229		0.94	0.978		1.14	0.762		1.30	0.151
12-HEPE		1.38	1.81E-02*		1.60	2.62E-03**		1.48	0.252		1.67	4.13E-02*
17,18-diHETE		1.00	0.524		1.11	0.978		1.16	0.121		0.93	0.599
Docosahexsaenoic acid (22:6 FA) & its metabolites
Docosahexaenoic acid		0.98	1.51E-02*		0.96	0.359		1.42	3.02E-02*		1.28	1.03E-02*
4-HDoHE		3.25	6.10E-05***		2.56	6.10E-05***		1.90	4.27E-04***		4.09	6.10E-05***
10-HDoHE		0.52	3.36E-03**		0.41	6.71E-03**		0.44	1.25E-02*		0.34	6.71E-03**
14-HDoHE		1.51	4.79E-02*		1.66	2.62E-03**		1.20	0.277		2.14	6.71E-03**
20-HDoHE		0.51	3.05E-04***		0.62	1.22E-04***		0.50	5.37E-03**		0.53	5.37E-03**
19,20-diHDoPE		1.02	0.934		1.01	0.561		1.03	0.804		0.93	0.524
HOTrE, hydroxyoctadecatrienoic acid; HHT, hydroxyheptadecatrienoic acid; HETE, hydroxyeicosatetraenoic acid; diHETE, dihydroxyeicosatetraenoic acid; diHETrE, dihydroxyeicosatrienoic acid;
HEPE, hydroxyeicosapentaenoic acid; HDoHE, hydroxydocosahexaenoic acid
Statistical analysis was performed by Wilcoxon matched-paired signed-ranked for the comparison of each metabolite level between serum and plasma from the same test subjects.
*p < 0.05, **p < 0.01, ***p < 0.001
N.D. indicate that MS2 or MS3 fragment ion was not detected in structual analysis using LTQ Orbitrap.
