# Supplementary material for: Plasma and Serum Lipidomics of Healthy White Adults Shows Characteristic Profiles by Subjects’ Gender and Age
Source: PLoS One. 2014 Mar 14;9(3):e91806. doi: 10.1371/journal.pone.0091806 (PMC3954792; doi:10.1371/journal.pone.0091806)
Supplement: Table S5 — Age-associated differences (fold changes and statistical analysis) in the levels of lipid metabolites. (XLSX) [file pone.0091806.s005.xlsx]

## Sheet: suppl. Table 5
Table S5. Age-associated differences (fold changes and statistical analysis) in the levels of lipid metabolites.
		Young vs Elderly (Male Plasma)			Young vs Elderly (Female Plasma)			Young vs Elderly (Male Serum)			Young vs Elderly (Female Serum)
		Median fold	p value		Median fold	p value		Median fold	p value		Median fold	p value
		Change	Mann Whitney		Change	Mann Whitney		Change	Mann Whitney		Change	Mann Whitney
		(Elderly/Young)	U-test		(Elderly/Young)	U-test		(Elderly/Young)	U-test		(Elderly/Young)	U-test
Lysophosphatidylcholine (lysoPC)
lysoPC(16:1)+HCOO		1.04	0.595		1.69	6.57E-03**		1.15	0.305		1.22	0.0975
lysoPC(16:0)+HCOO		1.05	0.436		1.36	3.29E-02*		1.03	0.345		1.11	0.412
lysoPC(17:0)+HCOO		1.00	0.87		1.13	0.345		1.09	0.713		1.12	0.539
lysoPC(18:2)+HCOO		0.80	0.935		1.29	0.137		0.83	0.595		1.17	0.461
lysoPC(18:1)+HCOO		1.08	0.87		1.41	8.64E-03**		0.99	0.539		1.29	0.148
lysoPC(18:0)+HCOO		1.12	0.305		1.44	4.08E-02*		1.16	4.53E-02*		1.16	0.126
lysoPC(20:4)+HCOO		1.09	0.367		1.26	2.95E-02*		1.07	0.285		1.26	0.174
lysoPC(20:3)+HCOO		1.23	0.486		1.27	3.29E-02*		1.21	0.174		1.28	0.305
lysoPC(22:6)+HCOO		1.10	0.267		1.79	1.41E-03**		1.15	0.0675		1.37	2.35E-02*
Phatidylcholine (PC)
PC(32:2)+HCOO	14:0-18:2 PC	1.10	0.512		0.97	0.512		1.19	0.389		0.98	0.713
PC(32:1)+HCOO	16:0-16:1/14:0-18:1 PC	0.85	0.838		1.36	0.461		1.00	0.512		1.36	0.775
PC(32:0)+HCOO	16:0-16:0 PC	1.12	0.285		1.09	0.744		1.22	4.53E-02*		0.91	0.935
PC(33:2)+HCOO	15:0-18:2 PC	0.94	0.653		1.09	0.935		1.19	0.217		0.91	0.148
PC(34:4)+HCOO	14:0-20:4 PC	1.31	0.25		1.36	0.137		1.74	2.09E-02*		1.40	0.202
PC(34:2)+HCOO	16:0-18:2 PC	0.96	0.744		1.06	0.567		1.01	0.367		0.98	0.486
PC(34:1)+HCOO	16:0-18:1 PC	0.99	0.87		1.12	0.461		1.10	0.325		1.10	0.967
PC(34:0)+HCOO	16:0-18:0 PC	1.13	0.389		1.31	0.137		1.12	2.35E-02*		1.06	0.436
PC(35:4)+HCOO	15:0-20:4 PC	1.08	0.775		1.21	0.345		1.19	0.148		1.20	0.838
PC(35:3)+HCOO	17:1-18:2 PC	0.96	0.902		1.36	0.436		0.94	0.935		1.04	0.935
PC(36:5)+HCOO	18:2-18:3 PC	0.96	0.461		1.28	0.137		1.32	0.267		1.49	0.217
PC(36:5)+HCOO	16:1-20:4 PC	0.97	0.935		1.54	0.0814		1.12	0.305		1.40	2.35E-02*
PC(36:5)+HCOO	16:0-20:5 PC	1.41	5.70E-03**		1.34	1.86E-02*		1.81	2.64E-04***		1.07	0.161
PC(36:4)+HCOO	18:2-18:2 PC	0.91	0.967		1.3	0.367		0.88	0.87		1.00	0.806
PC(36:4)+HCOO	16:0-20:4 PC	1.08	0.412		1.19	0.126		1.09	0.436		1.06	1
PC(36:3)+HCOO	16:0-20:3 PC	1.13	0.461		1.15	0.305		1.28	2.64E-02*		1.11	0.775
PC(36:2)+HCOO	18:0-18:2 PC	1.00	0.806		1.07	0.233		1.03	0.305		1.00	0.683
PC(36:1)+HCOO	18:0-18:1 PC	1.09	0.512		1.39	0.0975		1.25	3.67E-02*		1.16	0.126
PC(37:2)+HCOO	19:0-18:2 PC	1.05	0.902		1.04	0.967		1.24	0.0975		0.94	0.838
PC(38:6)+HCOO	18:2-20:4 PC	1.02	0.935		1.57	4.53E-02*		1.04	0.325		1.22	0.25
PC(38:6)+HCOO	16:0-22:6 PC	1.29	0.325		1.32	2.35E-02*		1.22	0.137		1.22	0.0555
PC(38:5)+HCOO	16:0-22:5/18:1-20:4 PC	0.97	0.512		1.28	2.09E-02*		1.15	0.0613		1.19	0.137
PC(38:5)+HCOO	18:0-20:5	1.22	0.126		1.44	1.64E-02*		1.34	0.0555		1.31	2.95E-02*
PC(38:4)+HCOO	16:0-22:4 PC	1.17	0.935		1.21	0.187		1.18	0.345		1.05	0.512
PC(38:4)+HCOO	18:0-20:4 PC	1.03	0.25		1.28	2.95E-02*		1.06	0.202		1.13	0.25
PC(38:3)+HCOO	18:1-20:2/18:2-20:1 PC	1.04	0.775		1.36	0.436		1.11	0.148		1.18	0.595
PC(38:3)+HCOO	18:0-20:3 PC	1.05	0.345		1.31	0.187		1.27	0.0742		1.23	0.345
PC(40:8)+HCOO	18:2-22:6/20:4-20:4 PC	1.21	0.202		1.85	4.08E-02*		1.15	0.126		1.69	0.0502
PC(40:7)+HCOO	18:1-22:6 PC	1.04	0.486		1.69	2.70E-03**		1.07	0.217		1.22	1.64E-02*
PC(40:6)+HCOO	18:1-22:5 PC	1.25	0.486		1.53	0.25		1.19	0.126		1.48	0.0555
PC(40:6)+HCOO	18:0-22:6 PC	1.42	0.325		1.71	1.96E-03**		1.18	3.67E-02*		1.65	1.28E-02*
PC(40:5)+HCOO	20:1-20:4 PC	1.10	0.367		1.34	1.45E-02*		1.20	4.08E-02*		1.32	0.0555
PC(40:5)+HCOO	18:0-22:5 PC	0.99	0.806		1.75	7.54E-03**		1.09	0.325		1.37	4.53E-02*
PC(40:4)+HCOO	18:0-22:4 PC	0.90	0.838		1.14	0.0892		1.29	0.412		1.23	0.106
ether PC
PC(32:0p)+HCOO	16:0p-16:0 PC	0.83	0.595		0.94	0.967		1.15	0.367		0.88	0.806
PC(32:0e)+HCOO	16:0e-16:0 PC	1.04	0.806		0.93	0.935		1.10	0.412		0.83	0.683
PC(34:2p)+HCOO	16:0p-18:2 PC	0.74	0.126		0.92	0.713		0.70	0.412		0.83	0.202
PC(34:2e)+HCOO	16:0e-18:2 PC	0.87	0.305		0.98	1		1.05	0.902		1.00	0.713
PC(34:1p)+HCOO	16:0p-18:1/18:1p-16:0 PC	1.05	1		1.09	0.744		1.10	0.367		1.04	0.87
PC(34:1e)+HCOO	16:0e-18:1/18:1e-16:0 PC	0.95	0.806		1.25	0.512		1.07	0.412		1.02	0.935
PC(36:4p)+HCOO	16:0p-20:4 PC	0.79	0.0555		1.05	0.137		0.90	0.325		0.97	0.486
PC(36:4e)+HCOO	16:0e-20:4 PC	0.74	0.0892		1.00	0.806		0.82	0.305		0.84	0.713
PC(36:3p)+HCOO	18:1p-18:2 PC	0.94	0.116		1.06	0.935		0.84	0.412		0.85	0.653
PC(36:3e)+HCOO	18:1e-18:2 PC	0.96	0.624		0.96	0.806		1.11	0.567		0.82	0.285
PC(36:2p)+HCOO	18:0p-18:2 PC	0.71	0.25		0.90	0.744		0.79	0.539		0.91	0.461
PC(36:2e)+HCOO	18:0e-18:2 PC	1.04	0.713		1.01	0.461		1.13	0.653		1.00	0.935
PC(38:5p)+HCOO	18:1p-20:4 PC	0.96	0.436		1.15	0.0502		0.75	0.233		1.10	0.202
PC(38:5e)+HCOO	18:1e-20:4 PC	0.78	0.267		1.25	0.461		0.93	0.806		0.99	0.744
PC(38:4p)+HCOO	18:0p-20:4 PC	0.74	0.0975		1.11	0.174		0.85	0.267		1.16	0.25
PC(38:4e)+HCOO	16:0e-22:4 PC	0.82	0.187		1.17	0.0814		0.97	0.653		1.00	0.624
PC(38:4e)+HCOO	18:0e-20:4 PC	0.88	0.233		1.21	0.25		1.03	0.806		0.99	0.838
PC(40:5e)+HCOO	20:1e-20:4/18:0e-22:5 PC	0.87	0.512		1.22	0.935		0.97	0.595		1.27	0.202
PC(40:4e)+HCOO	20:0e-20:4 PC	0.99	0.461		1.07	0.461		0.92	0.595		1.04	0.806
PC(42:5e)+HCOO	22:1e-20:4/20:0e-22:5 PC	0.89	0.285		1.30	0.486		0.95	0.624		1.06	1
Lysophosphatidylethanolamine (lysoPE)
lysoPE(18:2)-H		0.96	0.713		1.36	0.0675		1.08	0.624		1.41	0.187
lysoPE(20:4)-H		1.01	1		1.21	0.0555		1.07	0.486		1.12	0.0555
Phatidylethanolamine (PE)
PE(34:2)-H	16:0-18:2 PE	1.04	0.486		1.30	2.09E-02*		1.15	0.187		1.31	1.86E-02*
PE(34:1)-H	16:0-18:1 PE	1.00	0.775		1.55	1.13E-02*		1.29	0.285		1.46	3.29E-02*
PE(36:3)-H	18:1-18:2 PE	0.77	0.935		2.04	4.08E-02*		1.00	0.624		1.54	0.106
PE(36:2)-H	18:0-18:2 PE	0.89	0.567		1.49	1.86E-02*		1.02	0.267		1.37	0.0814
PE(36:1)-H	18:0-18:1 PE	1.20	0.486		1.99	2.95E-02*		1.17	0.233		1.91	2.64E-02*
PE(38:6)-H	16:0-22:6 PE	1.02	0.345		1.49	1.13E-02*		1.36	0.126		1.55	0.0555
PE(38:5)-H	18:1-20:4 PE	1.06	0.683		1.34	0.0742		1.21	0.174		1.64	2.09E-02*
PE(38:4)-H	18:0-20:4 PE	1.03	0.713		1.44	0.0675		0.96	0.267		1.28	0.161
PE(40:6)-H	18:0-22:6 PE	1.17	0.325		1.49	6.57E-03**		1.32	0.0742		1.45	2.95E-02*
ether PE
PE(34:2p)-H	16:0p-18:2 PE	0.82	0.202		1.17	0.436		0.86	0.624		1.29	0.838
PE(36:4p)-H	16:0p-20:4 PE	0.91	0.25		1.35	0.106		0.96	0.567		1.21	0.161
PE(36:2p)-H	18:0p-18:2 PE	0.92	0.512		1.21	0.267		1.02	0.87		1.06	0.744
PE(38:6p)-H	18:2p-20:4 PE	0.94	0.935		1.55	1.64E-02*		1.20	0.202		1.47	0.0742
PE(38:5p)-H	16:0p-22:5/18:1p-20:4 PE	0.90	0.148		1.07	0.305		1.11	0.744		1.14	0.345
PE(38:4p)-H	18:0p-20:4 PE	0.82	0.137		1.18	0.217		0.81	0.233		1.06	0.436
PE(40:7p)-H	N.D.	1.20	0.902		1.34	1.28E-02*		1.32	0.161		1.40	1.86E-02*
PE(40:6p)-H	18:0p-22:6 PE	1.11	0.512		1.69	1.13E-02*		0.95	0.25		1.56	2.35E-02*
PE(40:6e)-H	18:0e-22:6 PE	0.83	0.161		1.08	0.267		0.85	0.389		1.17	0.345
Phosphatidylinositol (PI)
PI(34:2)-H	16:0-18:2 PI	1.10	0.806		1.13	0.325		0.93	0.838		1.04	1
PI(36:1)-H	18:0-18:1 PI	0.96	0.683		1.12	0.233		1.05	0.653		1.14	0.624
PI(36:4)-H	16:0-20:4 PI	1.22	0.967		1.18	0.345		1.17	0.285		1.19	0.367
PI(36:3)-H	18:1-18:2 PI	0.98	1		1.35	0.137		1.01	0.217		1.16	0.174
PI(36:2)-H	18:0-18:2 PI	1.12	1		1.26	0.25		1.08	0.202		1.04	0.595
PI(38:5)-H	18:1-20:4 PI	1.01	0.902		1.69	2.95E-02*		0.92	0.436		1.10	0.305
PI(38:4)-H	18:0-20:4 PI	1.07	0.775		1.13	0.187		1.12	0.436		1.12	0.267
PI(38:3)-H	18:0-20:3 PI	1.04	0.967		0.88	0.87		1.15	0.624		0.86	0.744
Sphingomyelin (SM)
SM(33:1)+HCOO	d17:1-16:0 SM	1.07	0.838		1.03	0.389		1.11	0.233		1.03	0.838
SM(34:2)+HCOO	d18:2-16:0 SM	0.93	0.935		1.09	0.202		1.00	0.367		1.00	0.838
SM(34:1)+HCOO	d18:1-16:0 SM	1.01	0.595		1.10	0.267		1.14	0.25		1.04	0.87
SM(34:0)+HCOO	d18:0-16:0 SM	1.05	0.806		1.26	0.106		1.20	3.29E-02*		1.13	0.0892
SM(35:1)+HCOO	d17:1-18:0/d18:1-17:0 SM	1.07	0.461		1.15	0.486		1.04	0.775		1.10	1
SM(36:2)+HCOO	d18:2-18:0 SM	1.10	0.653		1.08	0.389		1.21	0.486		0.99	0.775
SM(36:1)+HCOO	d18:1-18:0 SM	1.18	0.461		1.17	0.267		1.42	0.305		1.08	0.87
SM(36:0)+HCOO	d18:0-18:0 SM	1.04	0.935		1.36	0.137		1.16	0.775		1.26	0.116
SM(38:2)+HCOO	d18:1-20:1 SM	1.05	0.683		1.31	0.0975		1.21	0.345		1.05	0.267
SM(38:1)+HCOO	d18:1-20:0 SM	1.14	0.233		1.14	0.217		1.30	3.67E-02*		0.96	0.567
SM(39:1)+HCOO	d16:1-23:0/d17:1-22:0 SM	1.16	0.367		1.13	0.233		1.19	0.0892		0.99	0.539
SM(40:3)+HCOO	d18:2-22:1 SM	1.16	0.683		1.07	0.775		1.02	0.683		0.92	0.486
SM(40:2)+HCOO	d18:2-22:0 SM	1.12	0.624		1.25	2.95E-02*		1.25	0.202		1.08	0.25
SM(40:1)+HCOO	d18:1-22:0 SM	1.18	0.486		1.02	0.137		1.27	0.0613		1.12	0.367
SM(40:0)+HCOO	d18:0-22:0 SM	1.04	0.624		1.39	0.0613		1.09	0.325		1.23	0.106
SM(41:2)+HCOO	d18:2-23:0 SM	0.99	0.683		1.27	0.0555		1.14	0.217		1.11	0.202
SM(41:1)+HCOO	d18:1-23:0 SM	1.02	0.653		1.12	0.106		1.17	0.0892		1.17	0.0675
SM(42:4)+HCOO	d18:2-24:2 SM	0.96	0.412		1.00	0.624		1.05	0.902		0.89	0.683
SM(42:3)+HCOO	d18:2-24:1 SM	0.94	0.87		0.90	0.436		1.08	0.267		1.03	0.595
SM(42:2)+HCOO	d18:1-24:1 SM	1.03	0.806		1.16	0.106		1.20	0.233		1.06	0.461
SM(42:1)+HCOO	d18:0-24:1 SM	0.90	0.653		1.35	1.28E-02*		1.06	0.389		1.28	0.0502
SM(42:1)+HCOO	d18:1-24:0 SM	1.04	0.713		1.04	0.161		1.17	0.0814		1.07	0.25
Ceramide (Cer)
Cer(34:1)+HCOO	N.D.	1.11	0.0814		1.26	0.116		1.17	0.116		1.23	0.0613
Cer(40:1)+HCOO	d18:1-22:0 Cer	1.22	0.106		1.27	0.0892		1.52	9.87E-03**		1.36	0.0502
Cer(41:1)+HCOO	d18:1-23:0 Cer	1.07	0.345		1.30	1.86E-02*		1.10	0.0613		1.22	0.0892
Cer(42:3)+HCOO	N.D.	1.08	0.567		1.32	0.106		1.24	0.116		1.41	1.41E-03**
Cer(42:2)+HCOO	d18:1-24:1 Cer	1.07	0.389		1.31	7.54E-03**		1.36	9.87E-03**		1.15	8.34E-04***
Cer(42:2)+HCOO	N.D.	1.52	0.217		1.33	0.0675		1.66	0.0975		1.41	1.28E-02*
Cer(42:1)+HCOO	d18:1-24:0 Cer	1.22	0.25		1.16	0.148		1.83	2.35E-02*		1.22	0.0975
Cerebroside (CB)
mono-hex CB(34:1)+HCOO	N.D.	1.07	0.412		1.00	1		1.32	3.29E-02*		1.00	0.713
mono-hex CB(40:1)+HCOO	d18:1-22:0 mono-hex CB	0.94	0.567		1.11	1		1.26	3.29E-02*		1.04	0.838
mono-hex CB(41:1)+HCOO	d18:1-23:0 mono-hex CB	0.98	0.683		1.02	0.87		1.35	4.53E-02*		0.89	0.285
mono-hex CB(42:2)+HCOO	d18:1-24:1 mono-hex CB	1.02	0.87		1.03	0.838		1.13	0.217		1.11	0.967
mono-hex CB(42:1)+HCOO	d18:1-24:0 mono-hex CB	0.97	1		0.98	0.461		1.30	4.53E-02*		0.94	0.389
di-hex CB(34:1)+HCOO	d18:1-16:0 di-hex CB	0.96	0.595		1.02	0.567		0.93	0.902		1.00	0.267
di-hex CB(42:2)+HCOO	N.D.	0.83	0.539		1.09	0.935		1.03	0.436		0.84	0.233
tri-hex CB(34:1)+HCOO	N.D.	1.10	0.567		0.92	0.653		1.05	0.305		0.87	0.902
Cholesterol (Ch)
Ch-OH		0.94	0.838		1.07	0.595		1.01	0.25		1.08	0.267
Cholesteryl Ester (ChE)
ChE(16:0)+NH4		1.00	0.653		1.11	0.0555		1.12	0.187		1.04	0.567
ChE(16:1)+NH4		0.94	0.683		1.01	0.653		1.08	0.325		1.04	0.87
ChE(18:1)+NH4		1.04	0.653		1.08	0.126		1.06	0.285		1.08	0.595
ChE(18:2)+NH4		1.08	0.967		1.04	0.233		1.05	0.0613		1.05	0.461
ChE(18:3)+NH4		1.30	3.67E-02*		1.27	0.0892		1.28	1.86E-02*		1.22	0.217
ChE(20:2)+NH4		0.74	0.389		0.84	0.567		1.02	0.683		0.75	0.305
ChE(20:3)+NH4		1.05	0.567		1.07	0.461		1.13	0.187		1.01	0.624
ChE(20:4)+NH4		1.19	0.683		1.13	0.116		1.07	0.461		1.23	0.345
ChE(20:5)+NH4		1.47	3.67E-03**		1.55	6.57E-03**		1.66	5.78E-04***		1.43	3.29E-02*
ChE(22:4)+NH4		0.93	0.935		1.08	0.0675		0.95	0.87		1.03	0.595
ChE(22:5)+NH4		1.00	0.935		1.55	3.29E-02*		1.17	0.512		1.43	1.28E-02*
ChE(22:6)+NH4		1.16	0.267		1.58	2.70E-03**		1.19	0.126		1.46	8.64E-03**
Coenzyme Q10 (CoQ10)
CoQ10+NH4		0.87	0.539		1.40	3.29E-02*		0.96	0.87		1.30	0.161
Diacylglycerol (DG)
34:2 DG+NH4		0.88	0.744		1.43	0.174		1.07	1		1.42	0.217
34:2 DG+NH4		1.31	0.775		1.72	0.0555		1.47	0.653		1.28	0.137
34:1 DG+NH4		0.88	0.624		1.37	0.412		0.94	0.713		1.29	0.267
34:1 DG+NH4		1.00	0.486		1.40	0.0613		1.13	0.345		1.69	0.0742
36:4 DG+NH4		0.92	0.461		1.43	0.187		0.85	0.744		1.59	0.161
36:3 DG+NH4		0.92	0.838		1.36	0.512		1.02	0.935		1.08	0.285
36:2 DG+NH4		0.62	1		1.27	0.0892		0.73	0.713		1.40	0.0502
Triacylglycerol (TG)
TG(40:0)+NH4		1.08	0.412		1.47	1.74E-04***		1.00	0.713		1.43	0.653
TG(44:1)+NH4		1.78	4.53E-02*		3.60	1.86E-02*		1.35	3.67E-02*		3.03	0.0675
TG(44:0)+NH4		1.05	0.148		2.41	0.148		1.12	0.137		1.86	0.174
TG(46:3)+NH4		1.57	0.106		3.37	5.70E-03**		1.75	0.202		4.10	3.67E-02*
TG(46:2)+NH4		2.26	0.174		1.46	0.0892		2.28	0.0814		1.42	0.161
TG(46:1)+NH4		1.68	0.161		1.83	0.0892		1.61	0.148		1.60	0.202
TG(46:0)+NH4		1.27	0.0742		1.88	0.217		1.46	0.0742		1.54	0.345
TG(47:1)+NH4		1.62	0.187		1.14	0.325		0.93	0.202		0.98	0.305
TG(47:0)+NH4		1.32	0.106		1.47	0.305		1.42	0.174		1.43	0.233
TG(48:4)+NH4		1.18	0.325		1.42	0.137		1.22	0.202		1.37	0.161
TG(48:3)+NH4		1.44	0.161		1.37	4.08E-02*		1.54	0.116		1.18	0.0892
TG(48:1)+NH4		1.87	0.174		1.28	0.305		1.17	0.137		1.34	0.305
TG(48:0)+NH4		1.47	0.0675		2.05	0.126		2.06	3.67E-02*		1.61	0.187
TG(49:3)+NH4		1.30	0.267		1.28	0.202		1.12	0.389		1.33	0.512
TG(49:2)+NH4		1.31	0.202		1.01	0.412		1.29	0.187		0.85	0.744
TG(49:1)+NH4		1.28	0.436		0.82	0.775		1.24	0.25		1.08	0.713
TG(49:1)+NH4		1.71	0.0975		1.12	0.412		1.19	0.267		0.77	0.595
TG(49:0)+NH4		1.49	0.0892		1.83	0.87		1.79	0.345		1.05	0.305
TG(49:0)+NH4		1.29	0.106		1.64	0.148		1.58	4.08E-02*		1.35	0.267
TG(50:4)+NH4		1.15	0.744		1.49	0.0742		1.25	0.567		1.44	0.174
TG(50:4)+NH4		2.04	0.0502		2.29	2.64E-02*		2.07	2.35E-02*		1.60	3.67E-02*
TG(50:3)+NH4		1.05	0.595		1.08	0.217		1.01	0.486		1.28	0.217
TG(50:1)+NH4		1.27	0.217		1.13	0.161		1.50	0.148		1.12	0.202
TG(50:0)+NH4		1.32	0.0892		2.95	0.106		1.42	0.0742		2.57	0.0975
TG(51:1)+NH4		1.23	0.305		1.30	0.116		0.95	0.202		1.17	0.137
TG(51:2)+NH4		0.98	0.624		1.36	0.267		0.91	0.567		1.00	0.567
TG(51:3)+NH4		0.89	0.838		0.95	0.567		1.04	0.624		0.92	0.967
TG(51:4)+NH4		0.85	0.935		1.14	0.512		1.01	0.595		1.05	0.595
TG(52:7)+NH4		1.57	1.13E-02*		1.92	3.94E-04***		1.37	2.35E-02*		1.70	1.67E-03**
TG(52:6)+NH4		1.34	0.187		2.21	1.19E-03**		1.71	0.202		2.06	3.16E-03**
TG(52:5)+NH4		1.52	0.595		2.29	0.0892		1.22	0.461		2.01	0.0814
TG(52:4)+NH4		0.82	0.744		1.10	0.267		0.98	1		1.08	0.305
TG(52:4)+NH4		1.19	0.126		2.01	3.29E-02*		1.56	0.0814		1.80	2.09E-02*
TG(52:3)+NH4		0.96	0.744		1.12	0.202		1.04	0.87		1.11	0.202
TG(52:2)+NH4		0.97	0.683		1.30	0.0675		0.91	0.567		1.23	0.116
TG(52:1)+NH4		1.24	0.217		1.30	2.64E-02*		1.27	0.106		1.51	2.95E-02*
TG(52:0)+NH4		1.53	0.174		1.95	2.35E-02*		1.89	0.0675		2.83	1.64E-02*
TG(53:5)+NH4		1.09	0.967		1.18	0.0814		1.35	1		1.10	0.137
TG(53:3)+NH4		0.84	1		1.14	0.174		0.86	0.87		0.96	0.775
TG(53:2)+NH4		0.93	0.713		1.16	0.0975		0.92	0.436		1.03	0.25
TG(53:1)+NH4		1.16	0.285		1.27	2.95E-02*		0.89	0.285		1.42	2.95E-02*
TG(54:7)+NH4		1.11	0.744		1.64	3.29E-02*		1.45	0.683		1.36	0.0814
TG(54:7)+NH4		1.37	0.161		2.18	1.96E-03**		1.51	0.0892		1.96	3.67E-03**
TG(54:6)+NH4		1.92	0.486		3.01	2.31E-03**		2.07	0.285		2.76	4.94E-03**
TG(54:5)+NH4		0.99	0.775		1.28	0.106		1.06	0.902		1.36	0.174
TG(54:5)+NH4		1.31	0.412		1.65	2.70E-03**		1.39	0.267		1.31	1.96E-03**
TG(54:4)+NH4		0.86	0.744		1.23	2.09E-02*		0.98	0.838		1.18	0.0502
TG(54:4)+NH4		1.33	0.367		1.60	0.0502		1.40	0.174		1.59	3.67E-02*
TG(54:2)+NH4		1.21	0.305		1.52	4.27E-03**		1.25	0.148		1.68	9.87E-03**
TG(54:1)+NH4		1.43	0.161		2.94	4.94E-03**		1.30	0.0613		3.25	3.67E-03**
TG(54:0)+NH4		1.52	0.285		3.20	1.28E-02*		2.13	0.174		2.13	6.57E-03**
TG(55:2)+NH4		1.24	0.461		1.71	2.95E-02*		0.99	0.217		1.62	9.87E-03**
TG(55:1)+NH4		1.38	0.486		1.69	0.0975		1.31	0.106		2.07	7.54E-03**
TG(56:8)+NH4		1.06	0.345		1.80	2.95E-02*		1.14	0.267		1.68	0.0555
TG(56:7)+NH4		0.82	0.87		2.27	3.94E-04***		0.74	1		2.18	7.54E-03**
TG(56:7)+NH4		1.31	0.345		2.10	2.35E-02*		1.62	0.174		1.79	2.95E-02*
TG(56:6)+NH4		0.57	0.838		1.99	1.19E-03**		0.68	0.838		1.63	1.13E-02*
TG(56:5)+NH4		1.06	0.902		1.79	3.67E-02*		1.05	0.87		1.46	4.08E-02*
TG(56:5)+NH4		1.05	1		1.25	3.67E-02*		0.95	0.683		1.30	0.0975
TG(56:4)+NH4		1.18	0.325		1.80	2.64E-02*		1.62	0.161		1.76	0.0975
TG(56:3)+NH4		0.97	0.87		1.66	1.19E-03**		0.85	1		1.43	7.54E-03**
TG(56:2)+NH4		1.28	0.389		2.41	1.96E-03**		1.31	0.202		1.99	2.70E-03**
TG(56:1)+NH4		1.65	0.267		3.15	4.94E-03**		1.83	0.0555		3.25	1.67E-03**
TG(56:0)+NH4		1.68	0.0892		1.84	3.67E-02*		2.20	2.09E-02*		3.96	6.96E-04***
TG(58:10)+NH4		0.98	0.87		2.35	1.19E-03**		1.21	0.389		2.39	3.16E-03**
TG(58:10)+NH4		1.47	0.25		2.76	1.41E-03**		1.65	0.116		2.62	3.16E-03**
TG(58:11)+NH4		1.26	0.461		2.36	4.78E-04***		1.30	0.202		1.67	3.23E-04***
TG(58:9)+NH4		1.40	0.267		2.10	4.40E-05***		1.47	0.267		1.79	8.98E-05***
TG(58:5)+NH4		1.10	0.713		1.89	1.13E-02*		1.29	0.305		1.69	7.54E-03**
TG(58:5)+NH4		1.15	0.87		1.63	0.0555		1.21	0.25		1.77	2.09E-02*
TG(60:11)+NH4		1.39	0.25		2.34	6.96E-04***		1.34	0.148		2.15	3.94E-04***
TG(60:10)+NH4		1.13	0.345		2.23	1.67E-03**		0.97	0.595		1.58	9.97E-04***
TG(60:3)+NH4		1.15	0.595		1.81	1.19E-03**		1.52	0.148		2.14	1.96E-03**
TG(60:1)+NH4		1.49	0.233		2.17	1.13E-02*		1.76	6.57E-03**		2.45	2.70E-03**
TG(61:6)+NH4		0.89	0.567		1.29	2.09E-02*		1.19	0.683		1.29	4.94E-03**
ether TG
TG(50:1e)+NH4		1.30	0.567		0.99	0.567		1.39	0.389		0.73	0.806
TG(52:1e)+NH4		1.37	0.486		1.09	0.512		1.48	3.29E-02*		1.28	0.187
TG(52:2e)+NH4		1.03	0.539		0.86	0.567		1.19	0.512		0.77	0.486
oxidized TG
TG(54:6)+O+NH4		1.09	1		0.77	0.567		1.03	0.806		0.91	0.713
Linolenic acid (18:3 FA) metabolites
9-HOTrE(alpha)		1.07	0.267		1.51	0.106		1.45	0.0555		2.19	4.08E-02*
13-HOTrE(alpha)		0.98	0.775		1.22	0.345		0.93	0.935		1.09	0.412
Arachidonic acids (20:4 FA) & its metabolites
Arachidonic acid		0.84	0.775		0.92	0.285		0.99	0.902		1.07	0.512
12-HHT		0.54	0.0555		0.81	0.0555		0.43	0.0892		0.75	0.267
5-HETE		2.00	3.29E-02*		0.84	0.838		1.29	0.161		1.44	0.0613
8-HETE		1.39	0.345		1.44	0.624		1.22	0.389		1.11	1
12-HETE		1.15	0.775		1.01	0.87		0.93	0.935		0.78	0.624
15-HETE		1.26	0.389		1.22	1		1.09	0.325		1.01	0.838
16-HETE		1.08	0.436		0.84	0.174		1.12	0.567		0.88	0.148
18-HETE		0.93	0.713		0.61	6.57E-03**		0.96	0.744		0.64	4.27E-03**
5,15-diHETE		1.41	0.148		1.14	0.512		1.07	0.683		0.81	0.595
5,6-diHETrE		1.22	0.148		1.09	0.87		1.05	0.775		1.07	0.389
11,12-diHETrE		0.89	0.412		0.79	4.94E-03**		0.96	0.512		0.76	1.13E-02*
14,15-diHETrE		0.89	0.267		0.80	8.64E-03**		0.93	0.567		0.79	2.09E-02*
Thromboxane B2		1.00	0.744		1.00	0.367		0.41	0.233		0.95	0.461
Eicosapentaenoic acid (20:5 FA) & its metabolites
Eicosapentaenoic acid		1.40	0.161		1.04	0.87		1.41	0.0502		1.37	0.325
5-HEPE		2.24	7.12E-05***		1.46	0.174		2.26	4.78E-04***		2.02	0.0555
12-HEPE		1.49	0.0742		1.47	0.285		1.60	0.0975		1.53	0.713
17,18-diHETE		1.25	0.325		0.91	0.713		1.46	0.161		0.76	0.325
Docosahexsaenoic acid (22:6 FA) & its metabolites
Docosahexaenoic acid		0.82	0.967		0.73	0.161		1.19	0.539		0.97	0.806
4-HDoHE		2.08	2.09E-02*		1.05	0.567		1.22	0.187		1.68	0.116
10-HDoHE		1.79	0.116		1.70	0.305		1.52	0.345		1.40	0.25
14-HDoHE		1.34	0.412		0.95	0.838		1.07	0.389		1.22	0.744
20-HDoHE		0.92	0.595		1.48	0.436		0.91	0.539		1.26	0.595
19,20-diHDoPE		1.06	0.683		1.06	0.902		1.07	0.412		0.98	0.838
HOTrE, hydroxyoctadecatrienoic acid; HHT, hydroxyheptadecatrienoic acid; HETE, hydroxyeicosatetraenoic acid; diHETE, dihydroxyeicosatetraenoic acid; diHETrE, dihydroxyeicosatrienoic acid;
HEPE, hydroxyeicosapentaenoic acid; HDoHE, hydroxydocosahexaenoic acid
Statistical analysis was performed by the Mann-Whitney U-test test for comparison of levels between ages.
*p < 0.05, **p < 0.01, ***p < 0.001
N.D. indicate that MS2 or MS3 fragment ion was not detected in structual analysis using LTQ Orbitrap.
